# Supplementary material
Source: publisher figshare collection journal article supplement (https://gsajournals.figshare.com/articles/dataset/_/5972902)
Supplement: Supplementary file 1 [file 1]

## Sheet: Variants
LG	Genomic Coordinate	Original Base	Changed Base	Type of Change	Location of Change	Gene Designation	Alternative Gene Designation	Type of Coding Change	Amino Acid Change
Sample 9
I	900743	T	G	SNV	coding_exon	Y95B8A.5	gpa-16	missense	L->R
I	2470980	T	C	SNV	coding_exon	Y74C10AL.2	Y74C10AL.2	missense	K->E
I	2917836	G	C	SNV	coding_exon	Y71F9AL.2	Y71F9AL.2	missense	W->S
I	5651842	G	A	SNV	coding_exon	F55F8.3	F55F8.3	missense	P->S
I	5981078	T	A	SNV	coding_exon	C06A5.4	madf-7	missense	T->S
I	6461423	G	A	SNV	coding_exon	K06A5.4	knl-2	missense	M->I
I	7245720	G	A	SNV	coding_exon	R06C7.4	cpg-3	missense	G->E
I	7503716	G	A	SNV	coding_exon	C26C6.8	C26C6.8	missense	L->F
I	7683365	G	A	SNV	coding_exon	T23G11.5	rlbp-1	missense	E->K
I	8110985	G	A	SNV	coding_exon	C09H6.2	lin-10	missense	R->W
I	8955342	G	A	SNV	coding_exon	F53B6.6	cutl-7	missense	P->S
I	9210327	G	A	SNV	coding_exon	F25H5.1	lim-9	missense	S->F
I	9465153	C	T	SNV	coding_exon	F46A9.3	twk-29	missense	T->I
I	10673475	T	C	SNV	coding_exon	C34B2.3	C34B2.3	missense	Y->H
I	11487974	C	T	SNV	coding_exon	K08C9.2	K08C9.2	missense	D->N
I	11502560	C	T	SNV	coding_exon	F32B4.8	F32B4.8	missense	T->I
I	11504369	T	A	SNV	coding_exon	F32B4.8	F32B4.8	missense	N->K
II	3417121	A	G	SNV	coding_exon	F18A12.1	F18A12.1	missense	D->G
II	4093693	C	T	SNV	coding_exon	R11F4.1	R11F4.1	missense	A->V
II	4134748	A	T	SNV	coding_exon	T08H4.3	ast-1	missense	I->N
II	5996692	A	G	SNV	coding_exon	ZK75.1	ins-4	missense	E->G
II	6442258	T	C	SNV	coding_exon	K06A1.3	cutl-16	missense	S->P
II	11970565	C	T	SNV	coding_exon	W03C9.7	mex-1	missense	H->Y
III	2835066	T	A	SNV	coding_exon	Y71H2AR.1	Y71H2AR.1	missense	I->N
III	3170885	A	G	SNV	coding_exon	R148.5	R148.5	missense	E->G
III	5057571	T	C	SNV	coding_exon	C45G9.10	C45G9.10	missense	E->G
III	5549805	A	G	SNV	coding_exon	F09F7.5	F09F7.5	missense	D->G
III	7358588	C	T	SNV	coding_exon	F08F8.4	F08F8.4	missense	D->N
III	7695496	T	A	SNV	coding_exon	C18H2.4	C18H2.4	missense	H->Q
III	10687137	A	G	SNV	coding_exon	Y39A1A.17	Y39A1A.17	missense	L->S
IV	865061	T	C	SNV	intron	Y55F3BR.2	Y55F3BR.2	splicing
IV	5373164	T	C	SNV	intron	F41H10.3	F41H10.3	splicing
IV	6831547	G	A	SNV	coding_exon	H20E11.1	H20E11.1	missense	V->I
IV	6874454	A	G	SNV	coding_exon	T05A12.1	srx-19	missense	I->V
IV	8715762	G	A	SNV	coding_exon	H23L24.2	H23L24.2	missense	V->M
IV	8772238	C	T	SNV	coding_exon	F20C5.6	F20C5.6	missense	E->K
IV	8967487	A	T	SNV	coding_exon	C53B4.2	C53B4.2	missense	T->S
IV	9683680	T	G	SNV	coding_exon	ZK1251.3	ZK1251.3	missense	I->S
IV	10241752	C	T	SNV	coding_exon	F01G10.7	lipl-7	missense	S->N
IV	10557147	A	T	SNV	coding_exon	T07G12.10	zim-2	missense	D->V
IV	10928531	A	T	SNV	coding_exon	ZK593.5	dnc-1	missense	W->R
IV	11227717	A	T	SNV	coding_exon	C29F4.2	C29F4.2	missense	D->E
IV	11290410	T	C	SNV	coding_exon	F54D1.6	F54D1.6	missense	I->T
IV	11859135	C	T	SNV	coding_exon	F38H4.9	let-92	missense	S->F
V	1764235	A	G	SNV	coding_exon	Y46H3B.1	clec-205	missense	D->G
V	1870651	A	C	SNV	coding_exon	T10B5.4	T10B5.4	missense	W->G
V	2939913	C	T	SNV	coding_exon	H27D07.3	srw-143	missense	G->E
V	4422043	C	T	SNV	coding_exon	Y47D7A.8	skr-14	missense	R->Q
V	4554260	A	T	SNV	coding_exon	Y61A9LA.12	Y61A9LA.12	missense	N->I
V	5002216	G	A	SNV	coding_exon	C13D9.3	srr-8	nonsense	W->*
V	6443503	G	A	SNV	coding_exon	T05H4.3	T05H4.3	missense	R->K
V	9005902	G	A	SNV	coding_exon	R03H4.3	srx-3	missense	V->M
V	9667960	T	A	SNV	coding_exon	ZK287.1	ZK287.1	missense	F->Y
V	10281273	T	G	SNV	coding_exon	Y22F5A.5	lys-2	missense	N->H
V	11601848	G	A	SNV	coding_exon	F35B12.9	F35B12.9	missense	V->I
V	11935357	G	A	SNV	coding_exon	F58H1.8	F58H1.8	missense	A->T
V	12154358	G	A	SNV	coding_exon	C27A7.9	C27A7.9	missense	L->F
V	12184138	C	T	SNV	coding_exon	ZK863.4	ZK863.4	missense	S->N
V	12385397	G	A	SNV	coding_exon	K01D12.3	K01D12.3	missense	E->K
V	12496402	T	C	SNV	coding_exon	W04D2.4	W04D2.4	missense	R->G
V	13626162	C	T	SNV	coding_exon	F53F4.12	F53F4.12	missense	T->M
V	13836436	G	A	SNV	intron	F55B12.9	srx-129	splicing
V	14513505	G	A	SNV	coding_exon	R02D5.6	R02D5.6	missense	T->I
V	14937954	G	T	SNV	coding_exon	C30G7.2	C30G7.2	missense	W->L
V	15723834	T	A	SNV	coding_exon	Y6E2A.6	srh-140	missense	D->E
V	15932349	T	C	SNV	coding_exon	T05G11.3	srw-26	missense	M->V
V	16042135	C	T	SNV	coding_exon	T10C6.13	his-2	missense	R->H
V	16922381	A	T	SNV	coding_exon	Y102A5C.4	Y102A5C.4	missense	I->F
V	17287524	C	G	SNV	coding_exon	K10G4.9	srw-30	missense	L->V
V	17468960	T	G	SNV	coding_exon	F20E11.17	F20E11.17	missense	D->A
X	981841	T	C	SNV	coding_exon	C44C1.1	C44C1.1	missense	S->P
X	3028678	G	A	SNV	coding_exon	M02F4.1	M02F4.1	missense	S->F
X	4618805	A	G	SNV	coding_exon	T13H2.4	pqn-65	missense	S->P
X	11514395	T	A	SNV	coding_exon	F29G6.3	hpo-34	missense	D->V
X	11534928	G	A	SNV	coding_exon	C35C5.8	C35C5.8	missense	E->K
X	12796557	G	A	SNV	coding_exon	T22H6.6	gei-3	missense	P->S
X	13453953	T	C	SNV	coding_exon	F02D10.5	flr-1	missense	D->G
X	14073041	A	G	SNV	coding_exon	C33G3.4	C33G3.4	missense	Y->C
X	15915914	T	C	SNV	coding_exon	F31B9.4	F31B9.4	missense	Y->C
X	17268001	A	G	SNV	coding_exon	C33E10.6	C33E10.6	missense	D->G
Sample 11
I	1570485	G	A	SNV	coding_exon	Y92H12A.1	src-1	missense	E->K
I	4250982	G	A	SNV	coding_exon	C43E11.11	cogc-5	missense	E->K
I	4399322	G	A	SNV	coding_exon	T21E12.4	dhc-1	missense	V->I
I	8366992	G	A	SNV	coding_exon	F16D3.4	F16D3.4	missense	A->V
I	8415106	G	A	SNV	coding_exon	F02E9.7	F02E9.7	missense	D->N
I	9865928	T	C	SNV	coding_exon	K10C3.5	K10C3.5	missense	M->T
I	11611042	G	A	SNV	coding_exon	C17D12.7	C17D12.7	missense	P->S
I	12215026	G	A	SNV	coding_exon	C15C6.4	C15C6.4	missense	R->H
I	12453891	G	A	SNV	coding_exon	C54C8.5	glct-5	missense	R->K
I	12715743	C	T	SNV	coding_exon	T06G6.5	T06G6.5	missense	L->F
I	13015540	A	G	SNV	coding_exon	ZK256.1	pmr-1	missense	N->S
I	13616463	C	T	SNV	coding_exon	Y6B3A.1	agef-1	missense	E->K
I	13875835	A	G	SNV	coding_exon	W04A8.7	taf-1	missense	D->G
I	14066464	G	A	SNV	coding_exon	F47G4.4	F47G4.4	missense	T->I
II	1927023	G	A	SNV	coding_exon	F52C6.2	F52C6.2	missense	V->I
II	2724387	C	T	SNV	coding_exon	T05A8.4	nep-2	missense	M->I
II	2753655	G	A	SNV	coding_exon	F29A7.3	F29A7.3	missense	A->T
II	2771292	A	G	SNV	coding_exon	F08D12.9	sdz-10	missense	V->A
II	3111099	T	A	SNV	coding_exon	Y25C1A.13	Y25C1A.13	missense	N->Y
II	4372482	C	T	SNV	coding_exon	B0286.3	B0286.3	missense	E->K
II	4667518	A	T	SNV	coding_exon	T05A7.10	fut-5	missense	I->K
II	4947617	C	T	SNV	coding_exon	ZK546.2	ZK546.2	missense	S->F
II	5184501	G	A	SNV	coding_exon	C27D6.4	crh-2	missense	S->L
II	5194475	C	T	SNV	coding_exon	C34F11.6	msp-49	missense	S->F
II	5528243	G	T	SNV	coding_exon	ZK177.1	ZK177.1	missense	C->F
II	6168556	C	T	SNV	coding_exon	F40H3.5	hst-3.1	missense	D->N
II	6235361	G	T	SNV	coding_exon	T24H7.5	tat-4	missense	T->K
II	6624692	C	A	SNV	coding_exon	F54H5.5	F54H5.5	nonsense	E->*
II	7151260	T	G	SNV	coding_exon	T07F8.1	T07F8.1	nonsense	Y->*
II	7703620	C	T	SNV	coding_exon	B0495.7	B0495.7	missense	M->I
II	8426678	T	A	SNV	coding_exon	F14E5.2	F14E5.2	missense	H->L
II	8628229	G	A	SNV	coding_exon	T22C8.6	T22C8.6	missense	A->V
II	8887884	G	A	SNV	coding_exon	T07D4.4	ddx-19	missense	G->E
II	9159562	T	A	SNV	coding_exon	W07A12.6	oac-54	missense	M->K
II	11126035	T	G	SNV	coding_exon	F40F8.10	rps-9	missense	M->L
II	12447670	G	A	SNV	intron	W05H5.3	W05H5.3	splicing
II	12580531	T	G	SNV	coding_exon	Y38E10A.5	clec-4	missense	T->P
II	12580535	AT	A	deletion	coding_exon	Y38E10A.5	clec-4	frameshift
II	12904937	T	C	SNV	coding_exon	F35C5.9	clec-66	missense	L->P
II	13109158	T	A	SNV	coding_exon	F29C12.1	pqn-32	missense	F->I
II	13112965	G	A	SNV	coding_exon	F29C12.3	rict-1	missense	T->I
II	13646111	G	A	SNV	intron	C31C9.4	fbxa-168	splicing
II	14235359	C	T	SNV	coding_exon	Y48B6A.11	jmjd-2	missense	E->K
II	14243494	A	T	SNV	coding_exon	Y48B6A.11	jmjd-2	missense	F->I
III	197174	A	G	SNV	coding_exon	F40G9.17	F40G9.17	missense	T->A
III	2334333	A	C	SNV	coding_exon	Y54F10BM.1	Y54F10BM.1	missense	I->L
III	2563439	T	C	SNV	coding_exon	Y54F10AM.11	Y54F10AM.11	missense	M->V
III	2665231	A	T	SNV	coding_exon	H19M22.2	let-805	readthrough	*->C
III	5271270	C	T	SNV	coding_exon	ZC395.8	ztf-8	missense	G->E
III	5458519	C	T	SNV	coding_exon	F48E8.4	F48E8.4	missense	S->L
III	9119562	G	A	SNV	coding_exon	ZK512.3	ced-11	missense	D->N
III	10138351	A	G	SNV	coding_exon	ZK1128.7	ZK1128.7	missense	T->A
IV	234484	T	A	SNV	coding_exon	R02D3.4	R02D3.4	nonsense	K->*
IV	2831713	A	G	SNV	coding_exon	Y54G2A.48	Y54G2A.48	missense	M->T
IV	4393129	A	G	SNV	coding_exon	Y24D9A.2	set-21	missense	D->G
IV	4812901	A	G	SNV	coding_exon	H06H21.2	srw-95	missense	I->V
IV	7478832	G	A	SNV	coding_exon	F55G1.4	rod-1	missense	G->E
IV	7646120	A	C	SNV	coding_exon	F45E4.9	hmg-5	missense	N->K
IV	8907364	A	G	SNV	coding_exon	C27B7.7	C27B7.7	missense	I->V
IV	9105209	T	A	SNV	coding_exon	C01F6.4	fem-3	missense	V->E
IV	9210598	T	A	SNV	coding_exon	C46C2.1	wnk-1	missense	D->E
IV	10445490	A	T	SNV	coding_exon	F13B12.4	F13B12.4	missense	Y->N
IV	12053210	G	A	SNV	coding_exon	K08E4.1	spt-5	missense	V->I
IV	12458557	G	A	SNV	coding_exon	C25G4.7	C25G4.7	missense	G->E
IV	16945020	T	C	SNV	coding_exon	Y116A8C.9	Y116A8C.9	missense	D->G
V	2222661	G	A	SNV	intron	F44C8.5	nhr-128	splicing
V	3479892	A	T	SNV	coding_exon	C02A12.3	srbc-30	nonsense	C->*
V	3666721	A	T	SNV	coding_exon	Y39H10B.1	str-113	missense	N->K
V	5063929	T	C	SNV	coding_exon	K11D12.10	mlk-1	missense	E->G
V	6361583	T	C	SNV	coding_exon	F13H6.1	F13H6.1	missense	M->T
V	9178915	A	G	SNV	coding_exon	C24B5.3	ptr-1	missense	V->A
V	10316031	G	A	SNV	coding_exon	B0024.10	B0024.10	missense	P->S
V	10952447	A	G	SNV	coding_exon	F17C11.4	F17C11.4	missense	H->R
V	11045630	G	A	SNV	coding_exon	C45B11.6	C45B11.6	missense	D->N
V	12230175	T	A	SNV	coding_exon	K12F2.1	myo-3	missense	T->S
V	15494235	T	G	SNV	coding_exon	C06B8.10	srh-218	missense	Y->D
V	15572634	G	A	SNV	coding_exon	F28F8.4	fbxa-95	missense	V->I
V	16139483	A	G	SNV	intron	F44G3.10	F44G3.10	splicing
V	16528246	T	G	SNV	coding_exon	F36D3.8	F36D3.8	missense	I->S
V	17116681	T	A	SNV	coding_exon	ZK218.8	ZK218.8	missense	F->Y
V	17166955	C	T	SNV	coding_exon	F40D4.9	srz-66	missense	V->I
V	17376117	G	A	SNV	coding_exon	Y20C6A.1	Y20C6A.1	missense	A->V
V	17629191	C	G	SNV	coding_exon	F57G4.10	F57G4.10	missense	A->G
V	17766646	G	A	SNV	coding_exon	C47A10.2	srh-283	missense	A->T
V	17921880	G	A	SNV	coding_exon	E01B7.2	E01B7.2	missense	E->K
V	18083329	G	A	SNV	coding_exon	Y59A8B.11	fbxa-106	missense	S->F
V	18327074	C	T	SNV	coding_exon	B0462.1	B0462.1	missense	S->L
V	18497303	G	A	SNV	coding_exon	Y51A2D.19	slo-1	missense	G->D
V	19551423	G	A	SNV	coding_exon	B0399.2	oac-1	missense	P->S
V	20508422	T	C	SNV	coding_exon	Y38H6C.5	dct-10	missense	M->T
X	1141594	G	A	SNV	coding_exon	R193.2	R193.2	missense	A->V
X	1249697	G	A	SNV	coding_exon	C25G6.4	C25G6.4	missense	A->V
X	6086309	G	A	SNV	coding_exon	C45B2.1	C45B2.1	missense	G->D
X	6820541	C	T	SNV	coding_exon	M03A8.4	gei-15	missense	A->T
X	7238629	A	T	SNV	coding_exon	F46H5.3	F46H5.3	missense	F->I
X	7591635	C	T	SNV	coding_exon	F08C6.1	adt-2	missense	P->L
X	8411698	A	G	SNV	coding_exon	F08F1.4	F08F1.4	start_ATG	M->V
X	9811455	C	T	SNV	coding_exon	F47A4.2	dpy-22	missense	G->R
X	9870167	G	A	SNV	intron	R07B1.13	R07B1.13	splicing
X	10339965	C	T	SNV	coding_exon	R07E3.1	R07E3.1	nonsense	W->*
X	10869455	C	T	SNV	coding_exon	T21E8.2	pgp-7	missense	A->T
X	12396543	G	A	SNV	coding_exon	F17E5.2	F17E5.2	missense	R->K
X	12796703	T	C	SNV	coding_exon	T22H6.6	gei-3	missense	E->G
X	13547746	G	A	SNV	coding_exon	R01E6.1	odr-1	missense	L->F
X	13751278	T	C	SNV	coding_exon	K11E4.5	nhr-71	missense	M->T
X	14309284	T	C	SNV	coding_exon	C11H1.3	C11H1.3	missense	I->M
X	14450706	T	C	SNV	coding_exon	F23D12.5	jmjd-3.2	missense	Y->H
X	15692125	G	A	SNV	coding_exon	C03H12.1	C03H12.1	missense	D->N
X	16466584	T	C	SNV	coding_exon	F38E9.2	nas-39	missense	I->T
X	16769159	T	C	SNV	coding_exon	C10E2.6	C10E2.6	missense	M->V
X	17531524	C	T	SNV	coding_exon	R09G11.1	sup-10	missense	T->M
Sample 14
I	759724	G	A	SNV	coding_exon	Y18H1A.8	Y18H1A.8	missense	V->I
II	2826545	C	T	SNV	coding_exon	K12H6.5	K12H6.5	missense	M->I
II	10112816	C	T	SNV	coding_exon	ZK945.9	lov-1	missense	E->K
III	81940	G	A	SNV	coding_exon	F54C4.3	attf-3	missense	P->S
III	471128	G	A	SNV	coding_exon	Y55B1BR.4	Y55B1BR.4	missense	P->S
III	1196231	G	A	SNV	coding_exon	Y119D3B.15	dss-1	missense	P->S
III	1720631	G	A	SNV	coding_exon	Y22D7AR.12	Y22D7AR.12	missense	T->I
III	1852218	G	A	SNV	coding_exon	Y39A3CR.7	pqn-82	nonsense	W->*
III	2316887	G	A	SNV	coding_exon	Y54F10BM.2	iffb-1	missense	D->N
III	11634997	C	T	SNV	coding_exon	Y66A7A.8	tbx-33	missense	E->K
IV	197080	G	A	SNV	coding_exon	Y38C1AA.2	csn-3	missense	G->E
IV	8761984	TTAT	TT	deletion	coding_exon	F20C5.2	klp-11	frameshift
IV	9563975	G	A	SNV	coding_exon	T05A1.2	col-122	missense	G->E
IV	11554824	A	T	SNV	coding_exon	F12F6.8	F12F6.8	missense	N->K
IV	17272685	G	A	SNV	coding_exon	F26D10.10	gln-5	missense	T->I
V	1644665	C	T	SNV	coding_exon	K04F1.15	alh-2	missense	A->V
V	3433462	A	T	SNV	coding_exon	T20C4.1	srj-9	missense	N->I
V	3504374	G	A	SNV	coding_exon	C07G3.9	ugt-64	missense	S->F
V	3773992	G	A	SNV	coding_exon	R08E5.3	R08E5.3	missense	D->N
V	5660461	G	A	SNV	coding_exon	C14C11.6	mut-14	missense	A->V
V	6314207	G	A	SNV	coding_exon	T28C12.5	T28C12.5	missense	G->E
V	7233118	G	A	SNV	coding_exon	C05C8.5	C05C8.5	missense	S->F
V	7363825	G	A	SNV	coding_exon	C03G6.15	cyp-35A2	missense	A->V
V	7541885	G	A	SNV	coding_exon	C54F6.13	nhx-3	missense	S->L
V	8028446	G	A	SNV	coding_exon	F43H9.4	F43H9.4	missense	G->E
V	12011531	G	A	SNV	coding_exon	F57F5.4	add-2	nonsense	Q->*
V	12949381	G	A	SNV	coding_exon	T16G1.9	T16G1.9	missense	P->S
V	13128361	G	A	SNV	coding_exon	B0365.3	eat-6	missense	T->I
V	15912680	C	T	SNV	coding_exon	F35E8.6	F35E8.6	missense	A->V
V	17760408	C	T	SNV	coding_exon	C47A10.1	pgp-9	missense	A->V
V	18655021	G	A	SNV	coding_exon	Y69H2.12	tag-336	missense	G->E
X	695253	T	A	SNV	coding_exon	F02G3.1	ncam-1	missense	I->K
X	695616	G	A	SNV	coding_exon	F02G3.1	ncam-1	missense	M->I
X	8560063	G	A	SNV	coding_exon	D2021.1	utx-1	missense	E->K
X	11711709	G	A	SNV	coding_exon	C44C10.1	col-180	missense	A->V
X	13842576	G	A	SNV	coding_exon	M03B6.1	M03B6.1	missense	G->E
X	16277189	G	A	SNV	coding_exon	F52E10.1	sdc-1	missense	G->R
Sample 15
I	140481	G	A	SNV	coding_exon	F53G12.3	duox-2	missense	V->I
I	388884	C	T	SNV	coding_exon	R119.5	R119.5	missense	V->I
I	686566	T	A	SNV	coding_exon	Y18H1A.10	Y18H1A.10	missense	M->L
I	695244	T	G	SNV	coding_exon	Y18H1A.2	Y18H1A.2	missense	S->R
I	2553251	A	G	SNV	coding_exon	Y23H5B.1	Y23H5B.1	missense	N->S
I	4613460	G	A	SNV	coding_exon	C44E4.1	C44E4.1	missense	R->C
I	5331625	T	C	SNV	coding_exon	F48C1.7	spe-11	missense	H->R
I	6748665	T	G	SNV	coding_exon	W02D3.10	fnci-1	missense	K->T
I	6846525	G	A	SNV	coding_exon	H27M09.5	H27M09.5	missense	R->W
I	7924205	A	G	SNV	coding_exon	F20G4.1	smgl-1	missense	I->T
I	8098014	G	A	SNV	coding_exon	F18C12.3	F18C12.3	missense	E->K
I	9061336	A	T	SNV	coding_exon	W06D4.4	prmt-7	missense	V->D
I	12378222	T	C	SNV	coding_exon	T15D6.3	gly-17	missense	E->G
I	13760362	C	T	SNV	coding_exon	Y6B3B.4	Y6B3B.4	missense	T->I
II	127469	T	C	SNV	coding_exon	K10B4.5	srd-3	missense	T->A
II	1584167	T	C	SNV	coding_exon	T07H3.4	clec-21	missense	H->R
II	3544921	T	C	SNV	coding_exon	W09G10.4	apd-3	missense	E->G
II	4597733	C	T	SNV	coding_exon	M03A1.6	ipla-1	missense	R->K
II	6390591	T	A	SNV	coding_exon	F58F12.3	F58F12.3	nonsense	K->*
II	8328814	T	A	SNV	coding_exon	C26D10.2	hel-1	missense	K->M
II	11213174	A	T	SNV	coding_exon	T06D8.1	T06D8.1	missense	T->S
II	12770314	T	A	SNV	coding_exon	Y46G5A.13	tiar-2	missense	F->I
II	13416976	C	T	SNV	coding_exon	Y48E1C.1	Y48E1C.1	missense	P->S
III	973847	A	T	SNV	coding_exon	R06B10.2	R06B10.2	missense	D->E
III	4885833	G	A	SNV	coding_exon	C35D10.15	clec-6	missense	P->L
III	6788571	G	A	SNV	coding_exon	K07E12.1	dig-1	missense	V->I
III	6967100	C	T	SNV	coding_exon	F31E3.4	panl-2	missense	R->K
III	7075854	T	C	SNV	coding_exon	ZK418.6	ZK418.6	missense	E->G
III	7934728	A	T	SNV	coding_exon	C29E4.3	ran-2	missense	E->V
III	11549990	C	T	SNV	coding_exon	Y66D12A.13	Y66D12A.13	missense	T->I
III	12193342	C	T	SNV	coding_exon	Y75B8A.12	osm-12	missense	G->D
III	12452653	G	A	SNV	coding_exon	Y49E10.19	ani-1	missense	A->V
III	13261695	C	T	SNV	coding_exon	F56A8.3	F56A8.3	missense	T->I
IV	523489	A	T	SNV	coding_exon	W03G1.7	asm-3	missense	I->N
IV	804224	C	T	SNV	coding_exon	Y55F3BL.1	mrpl-46	missense	P->L
IV	11079377	A	G	SNV	coding_exon	M7.5	atg-7	missense	Y->H
IV	13696219	A	G	SNV	coding_exon	T23G4.127	T23G4.127	missense	M->T
V	760901	A	C	SNV	coding_exon	C05E4.15	C05E4.15	missense	N->K
V	1381643	G	A	SNV	coding_exon	Y75B7AL.4	rga-4	missense	L->F
V	1660321	A	G	SNV	coding_exon	K04F1.11	K04F1.11	missense	I->V
V	3359453	A	T	SNV	coding_exon	C04E12.5	C04E12.5	nonsense	K->*
V	3635201	A	C	SNV	coding_exon	F59B1.7	srx-41	missense	I->S
V	3658047	A	T	SNV	coding_exon	F59B1.9	acr-23	nonsense	Y->*
V	3845826	A	C	SNV	coding_exon	F47C10.1	nhr-185	missense	D->E
V	4179207	T	A	SNV	coding_exon	Y45G5AM.2	Y45G5AM.2	missense	Y->N
V	5095768	A	T	SNV	intron	C04F5.2	C04F5.2	splicing
V	5228153	G	A	SNV	coding_exon	Y49G5B.1	Y49G5B.1	missense	D->N
V	5793699	T	C	SNV	coding_exon	ZC250.2	ZC250.2	missense	Y->H
V	7230305	C	T	SNV	coding_exon	C05C8.4	gei-6	missense	R->K
V	7510595	T	C	SNV	coding_exon	C54F6.9	nhr-172	missense	M->T
V	9417891	C	T	SNV	coding_exon	F36D4.1	F36D4.1	missense	S->F
V	11840152	T	C	SNV	coding_exon	R13H4.8	R13H4.8	missense	V->A
V	13164300	C	T	SNV	coding_exon	T09E8.1	noca-1	missense	S->F
V	16865825	A	G	SNV	coding_exon	F49A5.5	clec-28	missense	M->V
V	18741023	C	T	SNV	coding_exon	F11D11.14	clec-250	missense	R->K
V	19749250	T	C	SNV	coding_exon	W04E12.6	clec-49	missense	Y->C
X	4247098	C	T	SNV	coding_exon	F48D6.4	F48D6.4	missense	A->T
X	4364150	A	T	SNV	coding_exon	F14H12.8	F14H12.8	missense	L->H
X	9751931	A	G	SNV	coding_exon	F15G9.4	him-4	missense	I->V
X	9825862	A	G	SNV	coding_exon	F47A4.3	rrc-1	missense	S->P
X	10825413	T	C	SNV	coding_exon	F31B12.3	frm-9	missense	I->V
X	12991096	A	G	SNV	coding_exon	F11C1.7	F11C1.7	missense	I->V
X	14278710	A	T	SNV	coding_exon	E02H4.2	E02H4.2	missense	L->M
X	14454969	A	G	SNV	coding_exon	Y66C5A.1	Y66C5A.1	missense	S->P
Sample 19
I	3927853	G	A	SNV	coding_exon	T20F5.7	T20F5.7	missense	A->V
I	6242316	G	A	SNV	coding_exon	C48E7.6	C48E7.6	nonsense	W->*
I	6290971	G	A	SNV	coding_exon	C10G11.6	C10G11.6	missense	R->H
I	6719112	G	A	SNV	coding_exon	T23B3.1	T23B3.1	missense	D->N
I	10684723	G	A	SNV	coding_exon	C34B2.7	sdha-2	missense	S->L
I	12284987	G	A	SNV	coding_exon	F56H6.13	F56H6.13	nonsense	W->*
II	189148	G	A	SNV	coding_exon	T01D1.5	T01D1.5	missense	P->S
II	2263290	G	A	SNV	coding_exon	K09F6.4	K09F6.4	missense	A->V
II	2447911	G	A	SNV	coding_exon	T22D2.1	vab-19	missense	R->K
II	5066372	G	A	SNV	coding_exon	C27A2.1	smc-5	missense	D->N
II	5831641	G	A	SNV	coding_exon	ZK1248.2	col-74	missense	A->T
II	7050896	G	A	SNV	coding_exon	ZK1127.5	ZK1127.5	missense	G->S
II	8086458	G	A	SNV	coding_exon	K02C4.3	K02C4.3	missense	S->L
II	8660920	G	A	SNV	coding_exon	D2085.6	D2085.6	missense	S->F
II	11217734	G	A	SNV	coding_exon	T06D8.1	T06D8.1	missense	V->I
II	11313251	G	A	SNV	coding_exon	T24F1.7	T24F1.7	missense	E->K
II	14755115	G	A	SNV	coding_exon	Y54E2A.4	Y54E2A.4	missense	G->D
III	3069114	G	A	SNV	coding_exon	H06I04.4	ubl-1	missense	A->T
III	6695829	G	A	SNV	coding_exon	F37A4.7	rbf-1	missense	R->Q
III	6967011	G	A	SNV	coding_exon	F31E3.4	panl-2	missense	P->S
III	8160945	G	A	SNV	coding_exon	C50C3.7	cil-1	missense	T->I
III	8183334	G	A	SNV	coding_exon	C50C3.2	C50C3.2	missense	E->K
III	9353608	G	A	SNV	coding_exon	K04H4.2	K04H4.2	missense	R->C
III	10790256	G	A	SNV	coding_exon	Y39A1B.2	ptr-19	missense	A->T
III	10790270	G	A	SNV	coding_exon	Y39A1B.2	ptr-19	missense	M->I
III	13459796	C	T	SNV	coding_exon	Y76A2A.1	tag-164	missense	S->F
IV	1234782	C	T	SNV	coding_exon	F38A1.8	F38A1.8	missense	A->T
IV	12095014	C	T	SNV	coding_exon	F11A10.5	F11A10.5	nonsense	Q->*
IV	12116926	C	T	SNV	coding_exon	M18.5	ddb-1	missense	M->I
IV	12149171	C	T	SNV	coding_exon	B0001.2	B0001.2	missense	G->E
IV	12450875	C	T	SNV	coding_exon	C25G4.5	dpy-26	missense	D->N
IV	12558264	C	T	SNV	coding_exon	ZK795.2	ZK795.2	missense	M->I
V	9660491	G	A	SNV	coding_exon	B0331.2	B0331.2	missense	T->I
V	12781974	G	A	SNV	coding_exon	ZC455.1	ZC455.1	missense	D->N
V	13311858	G	A	SNV	coding_exon	C50B6.2	nasp-2	missense	P->S
V	15348305	G	A	SNV	coding_exon	C29F3.5	clec-230	missense	S->F
V	17227757	G	A	SNV	coding_exon	T19C9.5	scl-25	missense	G->R
X	5116248	C	T	SNV	coding_exon	C42D8.8	apl-1	missense	G->R
X	7653154	C	T	SNV	coding_exon	F27D9.4	F27D9.4	missense	R->Q
X	8959783	C	T	SNV	intron	C48C5.3	aexr-3	splicing
X	9098401	C	T	SNV	coding_exon	C25A11.4	ajm-1	missense	A->V
X	10222156	C	T	SNV	coding_exon	C14H10.3	C14H10.3	missense	A->T
X	10797011	C	T	SNV	coding_exon	F31B12.1	plc-1	missense	D->N
X	11149958	T	C	SNV	coding_exon	C05C9.3	C05C9.3	missense	H->R
X	11803190	T	A	SNV	coding_exon	C34E11.1	rsd-3	missense	F->Y
X	12124679	G	T	SNV	coding_exon	T01H10.6	lgc-17	missense	G->C
X	12974042	C	T	SNV	coding_exon	VF11C1L.1	ppk-3	missense	V->I
X	13545558	C	T	SNV	coding_exon	R01E6.1	odr-1	missense	G->D
X	17293511	C	T	SNV	coding_exon	C33E10.8	C33E10.8	missense	V->I
Sample 21
I	12983214	C	T	SNV	coding_exon	C47B2.9	C47B2.9	nonsense	R->*
I	13067904	C	T	SNV	coding_exon	Y26D4A.2	hpo-2	missense	S->L
II	1854885	G	T	SNV	coding_exon	C52E2.1	fbxb-95	missense	R->L
II	2884797	T	G	SNV	coding_exon	Y110A2AL.12	hpo-20	missense	T->P
II	9583355	C	T	SNV	coding_exon	F35H8.7	wee-1.1	missense	S->N
II	11673553	C	T	SNV	coding_exon	C47D12.1	trr-1	missense	R->Q
II	13931611	G	A	SNV	coding_exon	W02B8.5	hot-3	missense	T->I
II	14499211	G	A	SNV	coding_exon	K10H10.3	dhs-8	missense	G->E
II	14705673	G	A	SNV	coding_exon	C09F9.2	C09F9.2	missense	G->D
III	8691426	G	A	SNV	coding_exon	B0303.4	B0303.4	missense	E->K
III	9245199	G	A	SNV	coding_exon	T23G5.5	dat-1	missense	G->E
III	10729401	C	T	SNV	coding_exon	W09D10.2	tat-3	missense	E->K
III	10760186	C	T	SNV	coding_exon	K01G5.9	K01G5.9	nonsense	R->*
III	12041678	C	T	SNV	coding_exon	Y79H2A.4	Y79H2A.4	missense	S->F
III	13473736	T	A	SNV	coding_exon	T27E9.5	pssy-2	missense	C->S
IV	1017660	G	A	SNV	coding_exon	Y55F3AM.3	Y55F3AM.3	missense	A->T
IV	7167089	G	A	SNV	coding_exon	C42D4.18	C42D4.18	missense	M->I
IV	9809624	C	T	SNV	coding_exon	W08D2.3	dct-15	missense	C->Y
V	668995	C	T	SNV	coding_exon	F31F4.13	sru-24	missense	E->K
V	2729020	C	T	SNV	coding_exon	C24B9.1	str-33	missense	A->V
V	4625840	C	T	SNV	coding_exon	F54D11.2	F54D11.2	missense	L->F
V	4667778	C	T	SNV	coding_exon	K03B4.5	srx-77	missense	G->S
V	7433864	C	T	SNV	coding_exon	F18E3.7	ddo-2	nonsense	W->*
V	8562449	G	A	SNV	coding_exon	F25G6.3	acr-16	missense	V->M
V	8595178	G	A	SNV	coding_exon	F41E6.6	tag-196	missense	R->K
V	10902015	G	A	SNV	coding_exon	F32D8.8	F32D8.8	missense	P->L
V	10971712	G	A	SNV	coding_exon	F53B7.5	fig-1	nonsense	Q->*
V	11001225	G	A	SNV	coding_exon	F53B7.4	F53B7.4	missense	P->S
V	11383224	C	T	SNV	coding_exon	F55C10.5	F55C10.5	nonsense	R->*
V	12067840	G	A	SNV	coding_exon	R07B7.4	R07B7.4	missense	H->Y
V	12109916	G	A	SNV	coding_exon	C13C4.4	C13C4.4	nonsense	R->*
V	12837129	G	A	SNV	coding_exon	C44H9.4	C44H9.4	missense	R->K
V	13023319	G	A	SNV	coding_exon	F15B9.7	fmi-1	missense	G->E
V	13963999	G	A	SNV	coding_exon	R10D12.14	R10D12.14	missense	V->I
V	15336035	G	A	SNV	coding_exon	ZK1037.10	wrt-7	missense	P->S
V	16104910	G	A	SNV	intron	F44G3.2	F44G3.2	splicing
V	16262905	G	A	SNV	coding_exon	T13F3.3	nhr-127	missense	G->E
V	18328596	G	A	SNV	coding_exon	B0462.1	B0462.1	missense	M->I
V	19189939	G	A	SNV	coding_exon	Y39B6A.3	Y39B6A.3	missense	A->V
V	20783345	T	G	SNV	coding_exon	F38A6.3	hif-1	missense	D->E
X	6301085	C	T	SNV	coding_exon	T07H6.1	T07H6.1	missense	P->L
X	13473877	C	T	SNV	coding_exon	F15A2.2	tre-4	missense	S->F
X	15448656	A	G	SNV	coding_exon	R03A10.5	R03A10.5	missense	E->G
X	17671211	G	A	SNV	coding_exon	T23E7.2	T23E7.2	missense	G->S
Sample 23
I	606804	C	T	SNV	coding_exon	F56A6.2	hum-7	missense	G->D
I	4897983	C	T	SNV	coding_exon	F21F3.5	unc-38	missense	A->T
I	5819391	C	T	SNV	coding_exon	C32F10.6	nhr-2	missense	G->R
I	7164152	C	T	SNV	coding_exon	K07G5.3	mks-6	missense	P->L
I	7598900	C	T	SNV	coding_exon	D2030.9	wdr-23	missense	L->F
I	9066433	C	T	SNV	coding_exon	W06D4.6	rad-54	missense	L->F
I	12027739	C	T	SNV	coding_exon	Y53C10A.10	Y53C10A.10	missense	P->S
II	3241313	A	C	SNV	coding_exon	C17F4.3	C17F4.3	missense	E->A
II	8164616	C	A	SNV	coding_exon	F10B5.7	rrf-3	missense	L->M
II	8226901	G	A	SNV	coding_exon	M110.5	dab-1	missense	A->T
II	10036273	G	A	SNV	coding_exon	F52H3.1	let-268	missense	L->F
II	14463140	G	A	SNV	coding_exon	Y54G11B.1	dmsr-6	missense	G->E
III	91843	C	T	SNV	coding_exon	C29F9.7	pat-4	missense	G->E
III	5146066	C	T	SNV	coding_exon	Y54H5A.2	Y54H5A.2	missense	E->K
III	7706019	C	T	SNV	coding_exon	C03B8.4	lin-13	missense	D->N
III	7984578	C	T	SNV	coding_exon	C06G4.2	clp-1	missense	P->L
III	8508862	C	T	SNV	coding_exon	C04D8.1	pac-1	missense	H->Y
III	10008416	C	T	SNV	coding_exon	C05B5.6	fbxa-155	missense	V->I
IV	2643866	G	T	SNV	coding_exon	Y69A2AR.2	ric-8	missense	V->F
IV	15064053	G	A	SNV	coding_exon	Y41E3.18	Y41E3.18	missense	A->V
V	3609313	C	T	SNV	coding_exon	T22F3.10	T22F3.10	missense	S->N
V	4278561	C	T	SNV	coding_exon	F47D2.7	srt-20	missense	R->K
V	4804175	C	T	SNV	coding_exon	R02F11.3	R02F11.3	missense	G->R
V	14188486	G	T	SNV	intron	ZC376.6	ZC376.6	splicing
V	15271233	C	T	SNV	coding_exon	T10H4.4	T10H4.4	missense	D->N
V	16316168	C	T	SNV	coding_exon	C31A11.9	str-214	missense	A->V
V	20801975	T	A	SNV	coding_exon	Y44A6D.5	Y44A6D.5	missense	Y->F
X	3662650	G	A	SNV	coding_exon	R11G1.1	R11G1.1	missense	D->N
X	6264288	G	A	SNV	coding_exon	W05H9.4	W05H9.4	missense	R->K
X	8437199	G	A	SNV	coding_exon	F08F1.1	kin-9	missense	E->K
X	11427516	G	A	SNV	coding_exon	F46C3.3	hum-4	missense	P->S
X	11854815	G	A	SNV	coding_exon	F54F7.8	F54F7.8	missense	P->L
MtDNA	8121	C	T	SNV	coding_exon	MTCE.26	MTCE.26	missense	L->F
Sample 24
I	5346598	A	T	SNV	intron	F55A12.5	F55A12.5	splicing
I	10572099	G	A	SNV	coding_exon	F25H2.13	rtel-1	missense	E->K
I	13167299	G	A	SNV	coding_exon	F22G12.5	F22G12.5	missense	R->K
I	14445289	G	A	SNV	coding_exon	Y105E8A.12	catp-1	missense	L->F
II	138219	T	C	SNV	intron	K10B4.1	K10B4.1	splicing
II	1734164	G	A	SNV	coding_exon	F45C12.15	ceh-83	missense	P->L
II	1869785	G	A	SNV	coding_exon	C16C4.4	math-14	missense	D->N
II	3154210	C	T	SNV	coding_exon	T10D4.12	sri-32	missense	V->M
II	6239256	G	A	SNV	coding_exon	T24H7.5	tat-4	missense	P->S
II	11641482	G	A	SNV	coding_exon	ZK20.2	kin-6	missense	E->K
III	65094	G	A	SNV	coding_exon	W05G11.6	W05G11.6	missense	A->V
III	156563	G	A	SNV	coding_exon	T17A3.10	T17A3.10	missense	P->S
III	1851047	C	T	SNV	coding_exon	Y39A3CR.7	pqn-82	nonsense	Q->*
III	1969331	C	T	SNV	coding_exon	R155.2	R155.2	missense	D->N
III	2330475	C	T	SNV	coding_exon	Y54F10BM.13	Y54F10BM.13	missense	G->R
III	5590143	T	C	SNV	coding_exon	F56D2.6	F56D2.6	missense	N->D
III	5678091	C	T	SNV	coding_exon	F54E7.8	F54E7.8	missense	G->S
III	6726929	C	G	SNV	coding_exon	Y102E9.2	Y102E9.2	missense	A->G
III	6789739	C	T	SNV	coding_exon	K07E12.1	dig-1	missense	P->L
III	10438240	T	G	SNV	coding_exon	H04D03.6	H04D03.6	missense	D->A
III	10789118	C	T	SNV	coding_exon	Y39A1B.2	ptr-19	missense	S->F
III	12469761	C	T	SNV	coding_exon	Y49E10.29	Y49E10.29	missense	P->L
III	13008271	C	T	SNV	coding_exon	ZK1010.9	snf-7	missense	A->V
IV	5334545	G	A	SNV	coding_exon	Y4C6B.3	Y4C6B.3	nonsense	W->*
IV	5474299	G	A	SNV	coding_exon	T11F8.4	T11F8.4	missense	S->F
IV	8288563	C	T	SNV	coding_exon	K07H8.10	K07H8.10	missense	E->K
IV	9316002	C	T	SNV	coding_exon	F49C12.9	F49C12.9	missense	E->K
IV	10963063	G	A	SNV	coding_exon	Y69E1A.7	aqp-3	missense	S->L
V	2190929	C	T	SNV	coding_exon	Y5H2B.4	srbc-42	missense	A->T
V	11710125	C	T	SNV	coding_exon	W05E10.4	tre-3	missense	S->N
V	15337130	C	T	SNV	coding_exon	ZK1037.10	wrt-7	missense	V->I
V	17919133	C	T	SNV	coding_exon	C06H5.8	C06H5.8	missense	P->S
X	642833	G	A	SNV	coding_exon	M6.1	ifc-2	missense	H->Y
X	4167486	G	A	SNV	coding_exon	ZK470.1	ZK470.1	missense	D->N
X	5156746	C	T	SNV	coding_exon	C31H2.4	C31H2.4	missense	S->N
X	10072715	C	T	SNV	coding_exon	ZC373.5	ZC373.5	missense	M->I
X	10574020	C	T	SNV	coding_exon	F57C7.1	bet-2	missense	S->L
X	10585635	T	A	SNV	coding_exon	F57C7.4	F57C7.4	missense	I->F
X	10669528	C	T	SNV	coding_exon	F13E6.2	F13E6.2	missense	D->N
X	12110992	C	T	SNV	coding_exon	T01H10.1	lgc-13	missense	P->S
X	17046955	A	T	SNV	coding_exon	C30G4.3	gcy-11	missense	C->S
Sample 25
I	8297311	C	T	SNV	coding_exon	F52B5.1	abts-1	missense	D->N
I	9002118	C	T	SNV	coding_exon	F36F2.4	syx-7	missense	A->T
I	14187741	C	T	SNV	coding_exon	ZK849.2	ZK849.2	missense	R->K
II	209496	C	T	SNV	coding_exon	F48A11.1	chs-2	missense	S->L
II	7742991	G	A	SNV	coding_exon	B0228.4	cpna-2	missense	V->I
II	9065344	G	A	SNV	coding_exon	T24B8.4	T24B8.4	missense	S->F
II	13608661	A	G	SNV	coding_exon	Y48E1B.10	gst-20	missense	Y->H
III	7890302	C	T	SNV	coding_exon	ZK688.5	ZK688.5	missense	D->N
III	10655815	C	T	SNV	coding_exon	Y39A1A.15	cnt-2	missense	L->F
III	13487387	C	T	SNV	coding_exon	T28A8.1	twk-40	missense	G->E
IV	593859	C	T	SNV	coding_exon	C18H7.4	C18H7.4	missense	A->V
IV	1114775	C	T	SNV	coding_exon	C44B12.8	srx-14	missense	E->K
IV	12365570	C	T	SNV	coding_exon	ZC518.3	ccr-4	missense	S->L
V	5138408	G	A	SNV	coding_exon	F14F9.3	F14F9.3	missense	D->N
V	6788258	G	A	SNV	intron	ZC404.2	ZC404.2	splicing
V	9177140	G	A	SNV	coding_exon	C24B5.2	spas-1	missense	A->T
V	9180621	G	A	SNV	coding_exon	C24B5.3	ptr-1	missense	P->S
V	12587586	G	A	SNV	coding_exon	E02A10.3	E02A10.3	missense	V->I
V	15171269	G	A	SNV	coding_exon	T09F5.8	srh-278	missense	V->I
V	18221818	G	A	SNV	coding_exon	F16H6.9	F16H6.9	missense	G->E
V	20631106	G	A	SNV	coding_exon	F46B3.14	F46B3.14	missense	P->S
X	1104666	G	A	SNV	coding_exon	C05D9.5	ife-4	missense	A->T
X	2176259	G	A	SNV	coding_exon	F48B9.8	F48B9.8	missense	A->V
Sample 27
I	94160	A	T	SNV	coding_exon	Y48G1C.1	Y48G1C.1	missense	L->F
I	759724	G	A	SNV	coding_exon	Y18H1A.8	Y18H1A.8	missense	V->I
I	14637347	C	T	SNV	coding_exon	Y105E8B.2	exoc-8	missense	R->K
II	4212491	A	T	SNV	coding_exon	F31D5.7	F31D5.7	missense	I->F
II	4710827	C	T	SNV	coding_exon	F10G7.1	tag-151	missense	S->L
II	4992861	C	T	SNV	coding_exon	T27F7.4	T27F7.4	missense	D->N
II	5688965	C	T	SNV	intron	C25H3.11	C25H3.11	splicing
II	6736555	G	A	SNV	coding_exon	T14B4.2	T14B4.2	missense	A->T
II	7409884	G	A	SNV	coding_exon	K02A2.2	srd-55	missense	G->E
II	8073147	G	T	SNV	coding_exon	T05H10.7	T05H10.7	missense	L->I
II	8165224	G	A	SNV	coding_exon	F10B5.7	rrf-3	missense	V->I
II	8933097	G	A	SNV	coding_exon	T21B10.2	enol-1	missense	E->K
II	11479119	C	T	SNV	coding_exon	W02B12.12	W02B12.12	missense	E->K
II	15104258	C	T	SNV	coding_exon	Y53F4B.21	Y53F4B.21	missense	L->F
III	1167385	G	A	SNV	coding_exon	Y71D11A.1	cdh-12	missense	G->R
III	5022423	C	T	SNV	coding_exon	R144.3	R144.3	missense	R->W
III	6596652	C	T	SNV	coding_exon	F20H11.2	let-765	missense	V->I
III	7283740	C	T	SNV	coding_exon	B0361.3	B0361.3	missense	L->F
III	9084953	G	A	SNV	coding_exon	F02A9.4	F02A9.4	missense	R->C
III	10258928	G	A	SNV	coding_exon	R01H10.6	bbs-5	missense	P->S
III	10923845	G	A	SNV	coding_exon	M142.4	vab-7	missense	E->K
III	12971584	G	A	SNV	coding_exon	Y39E4A.3	Y39E4A.3	missense	T->M
IV	4253120	C	T	SNV	coding_exon	F36A4.7	ama-1	missense	L->F
IV	5468504	C	T	SNV	coding_exon	Y52D5A.1	Y52D5A.1	nonsense	R->*
IV	6237527	C	T	SNV	coding_exon	F58F9.6	F58F9.6	missense	C->Y
IV	7322899	C	T	SNV	coding_exon	F42C5.10	ttm-4	missense	V->I
IV	8364724	A	G	SNV	coding_exon	D2096.12	D2096.12	missense	I->V
IV	8458673	G	A	SNV	coding_exon	T01B11.3	syx-4	missense	E->K
IV	9128524	G	A	SNV	coding_exon	C01F6.6	tag-60	missense	V->I
IV	10029230	G	A	SNV	coding_exon	F44D12.5	msd-2	missense	G->R
IV	12334054	C	T	SNV	coding_exon	F19B6.1	F19B6.1	missense	D->N
IV	14771172	C	T	SNV	coding_exon	Y57G11C.44	Y57G11C.44	missense	V->I
IV	14996105	C	T	SNV	coding_exon	Y41E3.3	Y41E3.3	missense	L->F
IV	16524675	C	T	SNV	coding_exon	Y51H4A.5	Y51H4A.5	missense	S->N
V	2253369	C	T	SNV	coding_exon	F41B5.8	str-253	missense	G->E
V	3143891	C	T	SNV	coding_exon	C36C5.7	srab-10	missense	R->K
V	6535926	C	T	SNV	intron	K04A8.6	dre-1	splicing
V	18199398	C	T	SNV	coding_exon	F16H6.4	F16H6.4	missense	P->S
X	835999	G	A	SNV	coding_exon	F39H12.1	F39H12.1	missense	E->K
X	3172034	G	A	SNV	coding_exon	F56E3.3	klp-4	missense	T->I
X	10463066	G	A	SNV	coding_exon	C39B10.1	C39B10.1	missense	L->F
X	16146430	G	A	SNV	coding_exon	F09C8.2	F09C8.2	missense	A->V
Sample 32
I	3400297	G	A	SNV	coding_exon	W05F2.4	W05F2.4	missense	S->F
I	3945470	G	A	SNV	coding_exon	T21E3.3	lrp-2	missense	T->I
I	5936916	G	A	SNV	coding_exon	B0207.6	B0207.6	missense	P->L
I	6844165	G	A	SNV	coding_exon	H27M09.4	dpy-14	missense	E->K
I	7444048	G	A	SNV	coding_exon	ZK524.2	unc-13	missense	G->E
I	9957427	G	A	SNV	coding_exon	T24D1.5	T24D1.5	missense	S->F
I	11242917	G	A	SNV	coding_exon	F46A8.3	F46A8.3	missense	T->I
II	57209	C	T	SNV	coding_exon	C23H3.4	sptl-1	missense	T->I
II	1381697	C	T	SNV	coding_exon	F54D12.9	F54D12.9	start_ATG	M->I
II	2184765	T	A	SNV	coding_exon	C33C12.8	C33C12.8	missense	Q->L
II	3016659	C	T	SNV	coding_exon	C41H7.1	C41H7.1	missense	S->F
II	6771713	C	T	SNV	intron	F41G3.12	agr-1	splicing
II	9906705	C	T	SNV	coding_exon	F26C11.3	F26C11.3	missense	A->T
II	11131679	C	T	SNV	coding_exon	F40F8.11	F40F8.11	missense	A->T
II	11663462	C	T	SNV	coding_exon	C47D12.1	trr-1	missense	R->Q
II	12279962	G	A	SNV	coding_exon	Y57A10A.29	Y57A10A.29	missense	D->N
II	14396078	G	A	SNV	coding_exon	F26H11.2	nurf-1	missense	E->K
II	15007263	G	A	SNV	coding_exon	Y53F4B.9	Y53F4B.9	missense	R->W
III	1561368	C	T	SNV	coding_exon	Y67D2.2	Y67D2.2	missense	P->S
III	3383137	C	T	SNV	coding_exon	F45H7.6	hecw-1	missense	R->K
III	4426354	C	T	SNV	intron	C28A5.6	C28A5.6	splicing
III	4598664	T	A	SNV	coding_exon	F10F2.1	sel-2	missense	N->Y
III	4885997	T	G	SNV	coding_exon	C35D10.15	clec-6	missense	K->N
III	4885998	T	A	SNV	coding_exon	C35D10.15	clec-6	missense	K->I
III	4885999	T	C	SNV	coding_exon	C35D10.15	clec-6	missense	K->E
III	4896080	G	A	SNV	coding_exon	F26F4.7	nhl-2	missense	S->F
III	6009844	G	A	SNV	coding_exon	ZK328.2	eftu-2	missense	A->T
III	9998679	G	A	SNV	coding_exon	C05B5.17	C05B5.17	missense	P->S
IV	2714082	G	A	SNV	coding_exon	Y94H6A.7	Y94H6A.7	missense	L->F
IV	3288270	G	A	SNV	coding_exon	T26C12.4	gcy-23	missense	R->C
IV	7417768	G	A	SNV	coding_exon	C48A7.1	egl-19	missense	M->I
IV	7795510	G	A	SNV	coding_exon	C33H5.15	sgo-1	missense	P->S
IV	8100554	G	T	SNV	coding_exon	Y42H9AR.2	Y42H9AR.2	missense	M->I
IV	9205603	G	A	SNV	coding_exon	C46C2.1	wnk-1	missense	S->N
IV	10410686	G	A	SNV	coding_exon	R10H10.7	R10H10.7	missense	P->L
V	5135810	G	A	SNV	intron	F14F9.4	F14F9.4	splicing
V	13382807	G	A	SNV	coding_exon	M04G12.2	cpz-2	missense	G->R
V	16785420	G	A	SNV	coding_exon	T25E12.4	dkf-2	missense	D->N
V	17353892	G	A	SNV	coding_exon	F47H4.2	F47H4.2	nonsense	W->*
V	17760450	G	A	SNV	coding_exon	C47A10.1	pgp-9	missense	R->Q
V	18205578	G	A	SNV	coding_exon	F16H6.6	F16H6.6	missense	R->K
X	15230086	T	C	SNV	coding_exon	H03A11.2	H03A11.2	missense	Y->C
Sample 35
I	497706	C	T	SNV	coding_exon	Y65B4BL.3	Y65B4BL.3	missense	R->K
I	3084828	C	T	SNV	coding_exon	M01B12.4	M01B12.4	missense	D->N
I	3529764	C	T	SNV	coding_exon	Y47G6A.19	Y47G6A.19	missense	D->N
I	8829573	G	A	SNV	coding_exon	F36A2.13	F36A2.13	missense	L->F
I	8932101	G	A	SNV	coding_exon	F53B6.2	madd-4	missense	S->F
I	9849088	G	A	SNV	coding_exon	K10C3.3	zig-1	missense	V->I
I	10656788	C	A	SNV	coding_exon	B0511.12	B0511.12	missense	A->S
I	11115049	G	A	SNV	coding_exon	W02B9.1	hmr-1	missense	A->V
I	14255967	C	T	SNV	coding_exon	K04H8.3	K04H8.3	missense	A->V
I	14961549	C	T	SNV	coding_exon	ZK909.4	ces-2	missense	S->L
III	2666605	C	T	SNV	coding_exon	H19M22.2	let-805	missense	T->I
III	4936778	G	A	SNV	coding_exon	C26E6.6	mrps-18C	missense	S->N
III	5300349	G	A	SNV	coding_exon	T15B12.2	T15B12.2	missense	L->F
III	6015185	G	A	SNV	coding_exon	ZK328.5	npp-10	missense	S->F
III	6022763	G	A	SNV	coding_exon	ZK328.1	cyk-3	missense	E->K
III	6197663	A	T	SNV	coding_exon	C23G10.7	C23G10.7	nonsense	Y->*
III	6197888	G	A	SNV	coding_exon	C23G10.7	C23G10.7	missense	L->F
III	7213806	G	A	SNV	coding_exon	R151.2	R151.2	missense	A->T
III	9438414	G	A	SNV	coding_exon	F54C8.3	emb-30	missense	T->M
III	9773904	C	T	SNV	coding_exon	R10E11.1	cbp-1	nonsense	Q->*
III	10632965	G	A	SNV	coding_exon	Y39A1A.10	Y39A1A.10	missense	E->K
III	10761634	G	A	SNV	coding_exon	K01G5.9	K01G5.9	missense	G->S
IV	3796438	C	T	SNV	coding_exon	M02B7.3	osm-3	missense	R->Q
IV	4083825	C	T	SNV	coding_exon	C35B1.5	C35B1.5	missense	E->K
IV	4084175	C	T	SNV	coding_exon	C35B1.5	C35B1.5	missense	A->T
IV	6397756	C	T	SNV	coding_exon	Y73B6BL.21	sfrp-1	nonsense	W->*
IV	6800445	C	T	SNV	coding_exon	C17H12.4	C17H12.4	missense	G->E
IV	10896231	G	A	SNV	coding_exon	F13E9.4	F13E9.4	nonsense	Q->*
IV	15119680	G	A	SNV	coding_exon	M199.3	clec-188	missense	E->K
V	2155752	G	A	SNV	coding_exon	C45H4.7	srbc-21	missense	A->T
V	11743993	G	A	SNV	coding_exon	T04F3.1	T04F3.1	missense	D->N
X	863047	G	A	SNV	coding_exon	F56F10.3	cdo-1	missense	P->L
X	5399062	G	A	SNV	coding_exon	C03F11.3	scav-1	missense	H->Y
X	10996470	G	A	SNV	coding_exon	F59F3.1	ver-3	missense	D->N
X	14100633	C	T	SNV	coding_exon	F16B12.5	F16B12.5	missense	L->F
X	14350820	C	T	SNV	coding_exon	K04G11.4	wdr-5.2	missense	P->S
X	14581929	C	T	SNV	coding_exon	C44H4.3	sym-1	missense	T->I
X	15811880	G	A	SNV	coding_exon	Y7A5A.11	Y7A5A.11	missense	R->Q
X	17088403	C	T	SNV	coding_exon	C08A9.3	C08A9.3	missense	G->R
X	17107448	T	A	SNV	coding_exon	C08A9.9	C08A9.9	missense	E->D
X	17411709	C	T	SNV	coding_exon	F11C7.4	crb-1	missense	G->D
Sample 42
I	9809472	G	A	SNV	coding_exon	F35C12.2	ncx-4	missense	D->N
I	11899141	C	T	SNV	coding_exon	Y47H9C.9	Y47H9C.9	missense	D->N
I	12939889	C	T	SNV	coding_exon	F08A8.1	acox-1	missense	L->F
II	55300	C	T	SNV	coding_exon	C23H3.7	tre-5	missense	R->K
II	268998	C	T	SNV	coding_exon	B0432.6	B0432.6	missense	D->N
III	2224866	G	A	SNV	coding_exon	C39B5.4	fbxa-38	missense	D->N
III	2920884	A	G	SNV	coding_exon	R10F2.4	R10F2.4	missense	M->T
III	4574526	G	A	SNV	coding_exon	F35G12.3	sel-5	nonsense	R->*
III	5532027	G	A	SNV	coding_exon	D1044.2	D1044.2	missense	G->D
III	5545015	G	A	SNV	coding_exon	D1044.1	D1044.1	missense	V->I
III	5972912	G	A	SNV	coding_exon	T04C9.4	mlp-1	missense	T->I
III	6386592	G	A	SNV	coding_exon	C16A3.3	let-716	missense	R->H
III	6862978	G	A	SNV	coding_exon	R13F6.9	sma-3	missense	S->F
III	8629007	G	A	SNV	coding_exon	F22B7.13	gpr-1	missense	M->I
III	8718015	G	A	SNV	coding_exon	B0303.15	mrpl-11	missense	G->D
III	8973116	G	A	SNV	coding_exon	R08D7.4	R08D7.4	missense	D->N
III	9737608	G	A	SNV	coding_exon	T05G5.2	hlh-4	missense	P->S
III	10759797	G	A	SNV	coding_exon	K01G5.9	K01G5.9	missense	G->R
IV	13435373	G	A	SNV	coding_exon	K09B11.10	mam-3	missense	T->I
IV	14438682	G	A	SNV	coding_exon	LLC1.1	tra-3	missense	H->Y
IV	15998236	G	A	SNV	coding_exon	Y105C5B.21	jac-1	missense	R->C
IV	16276907	G	A	SNV	coding_exon	F38C2.7	F38C2.7	missense	S->L
IV	16777494	G	A	SNV	coding_exon	Y43D4A.5	Y43D4A.5	missense	D->N
IV	16996100	G	A	SNV	coding_exon	Y116A8C.16	rom-4	nonsense	W->*
V	3970066	G	A	SNV	coding_exon	B0213.15	cyp-34A9	nonsense	Q->*
V	9532113	C	T	SNV	coding_exon	C50F4.2	C50F4.2	missense	S->F
V	10096600	C	T	SNV	coding_exon	R04B5.9	ugt-47	missense	R->Q
V	10357224	C	T	SNV	coding_exon	K07C5.5	ceeh-2	missense	M->I
V	12485920	C	T	SNV	coding_exon	W04D2.2	srt-39	missense	P->L
V	13764671	T	G	SNV	coding_exon	F20G2.6	F20G2.6	missense	F->V
V	15829711	C	T	SNV	coding_exon	F54B8.16	srbc-55	missense	M->I
V	16173973	C	T	SNV	coding_exon	K05D4.4	cyp-33D1	missense	E->K
V	16265442	C	T	SNV	coding_exon	T13F3.4	T13F3.4	missense	V->M
V	18106188	C	T	SNV	coding_exon	Y59A8B.14	par-4	missense	P->L
V	18642754	C	T	SNV	coding_exon	Y69H2.11	Y69H2.11	missense	S->L
V	20755407	A	T	SNV	coding_exon	F38A6.1	pha-4	missense	T->S
X	5027884	C	T	SNV	coding_exon	ZC449.1	ZC449.1	missense	S->F
X	5275869	C	T	SNV	coding_exon	Y34B4A.3	hst-6	missense	A->V
X	5293005	C	T	SNV	coding_exon	F32A6.4	ags-3	missense	D->N
X	5872243	C	T	SNV	coding_exon	F49E10.5	ctbp-1	missense	L->F
X	5872517	C	T	SNV	coding_exon	F49E10.5	ctbp-1	missense	A->V
X	10977809	G	A	SNV	coding_exon	K09C8.5	pxn-2	missense	P->S
X	11711775	G	A	SNV	coding_exon	C44C10.1	col-180	missense	P->L
X	11715514	G	A	SNV	coding_exon	C44C10.9	C44C10.9	missense	S->F
X	11804609	G	A	SNV	intron	C34E11.4	C34E11.4	splicing
X	13695391	G	A	SNV	coding_exon	C04A11.4	adm-2	missense	A->T
Sample 8 (Feb 5, 2016)
I	5177879	C	T	SNV	coding_exon	F56A3.3	npp-6	missense	P->S
I	5617607	C	T	SNV	coding_exon	F46F11.6	F46F11.6	missense	V->I
I	5652157	C	T	SNV	coding_exon	F55F8.3	F55F8.3	missense	A->T
I	6266689	C	T	SNV	coding_exon	C48E7.8	oac-9	missense	A->T
I	6547660	C	T	SNV	coding_exon	T10E9.9	acdh-4	missense	G->E
I	8575119	C	T	SNV	coding_exon	T01H8.1	rskn-1	nonsense	W->*
II	1060368	C	T	SNV	coding_exon	K02E7.9	btb-10	missense	R->H
II	1491399	C	T	SNV	coding_exon	H17B01.4	H17B01.4	missense	A->T
II	2181606	G	A	SNV	coding_exon	C33C12.3	C33C12.3	missense	G->R
II	4684570	C	T	SNV	coding_exon	T05A7.9	T05A7.9	missense	E->K
II	5421710	C	T	SNV	coding_exon	EEED8.1	mel-47	missense	S->L
II	5647004	C	T	SNV	coding_exon	F59E12.9	F59E12.9	missense	A->T
II	7234739	C	T	SNV	coding_exon	F32A5.3	F32A5.3	nonsense	Q->*
II	12633635	C	T	SNV	coding_exon	Y38E10A.17	Y38E10A.17	missense	V->I
II	13589828	G	A	SNV	coding_exon	Y48E1B.16	clec-145	missense	P->S
II	13917620	G	A	SNV	coding_exon	W02B8.3	mltn-3	missense	S->N
III	546316	C	T	SNV	coding_exon	T22F7.1	T22F7.1	missense	A->V
III	1134437	C	T	SNV	coding_exon	Y71D11A.5	lgc-46	nonsense	W->*
III	2879664	C	T	SNV	coding_exon	F56F11.3	klf-1	missense	T->I
III	4324843	T	A	SNV	coding_exon	H38K22.5	gly-6	missense	N->Y
III	6934792	C	T	SNV	coding_exon	F57B9.8	F57B9.8	missense	G->E
III	7827183	G	A	SNV	coding_exon	C27D11.1	egl-45	missense	R->C
III	9824333	G	A	SNV	coding_exon	ZK632.13	lin-52	missense	A->V
III	10760382	G	A	SNV	coding_exon	K01G5.9	K01G5.9	missense	A->T
III	10847812	G	A	SNV	coding_exon	R17.1	fbxb-85	missense	A->V
III	12931809	G	A	SNV	coding_exon	Y37D8A.21	Y37D8A.21	missense	A->V
III	12945050	G	A	SNV	coding_exon	Y37D8A.23	unc-25	missense	M->I
IV	3926758	G	A	SNV	coding_exon	F56D6.1	clec-68	missense	E->K
IV	4803002	C	T	SNV	coding_exon	R11E3.8	dpf-5	missense	A->T
IV	12050433	G	A	SNV	coding_exon	T12G3.8	bre-5	missense	T->I
IV	14219241	GAAAAAAAAA	GAAAAAAAA	deletion	coding_exon	F02H6.4	F02H6.4	frameshift
IV	15045348	G	A	SNV	coding_exon	Y41E3.11	Y41E3.11	missense	R->Q
V	7177438	G	A	SNV	coding_exon	F09G2.5	lgc-39	missense	D->N
V	7700716	G	A	SNV	coding_exon	ZK105.3	ZK105.3	missense	E->K
V	10492474	G	A	SNV	coding_exon	C35A5.1	aqp-5	missense	G->R
V	17494349	G	A	SNV	coding_exon	K03D7.6	srh-118	missense	P->L
V	18943133	G	A	SNV	coding_exon	Y80D3A.8	Y80D3A.8	missense	V->I
V	19966081	G	A	SNV	coding_exon	Y60A3A.5	srh-171	missense	V->I
V	20728074	G	A	SNV	coding_exon	W07A8.2	W07A8.2	missense	P->L
X	1252071	G	A	SNV	coding_exon	C25G6.5	npr-11	missense	A->V
X	3776860	G	A	SNV	coding_exon	F47B7.2	F47B7.2	missense	G->R
X	8827397	C	T	SNV	coding_exon	C28G1.5	C28G1.5	missense	E->K
X	15650843	A	T	SNV	coding_exon	F59D12.3	F59D12.3	missense	N->K
Sample 22 (Feb 5, 2016)
I	8444570	G	A	SNV	coding_exon	F10D11.5	F10D11.5	missense	P->S
I	8722678	G	A	SNV	coding_exon	C36B1.1	cle-1	missense	P->S
I	10664038	G	A	SNV	coding_exon	B0511.12	B0511.12	missense	P->S
I	12560578	G	A	SNV	coding_exon	W02D9.6	W02D9.6	missense	A->V
I	12561216	G	A	SNV	coding_exon	W02D9.5	ssp-37	missense	T->I
I	12743608	A	G	SNV	coding_exon	W02A11.4	uba-2	missense	E->G
I	13518220	G	A	SNV	coding_exon	Y87G2A.1	Y87G2A.1	missense	G->E
I	14630664	C	T	SNV	coding_exon	Y105E8B.1	lev-11	missense	G->E
II	174627	T	G	SNV	coding_exon	T01D1.3	T01D1.3	missense	N->H
II	1406071	G	A	SNV	coding_exon	Y51H7C.6	cogc-4	missense	G->S
II	1789924	G	A	SNV	coding_exon	C08F1.3	fbxb-13	nonsense	W->*
II	2587508	C	T	SNV	coding_exon	F33H12.2	sri-39	missense	S->L
II	6862210	G	A	SNV	coding_exon	C44B7.3	aff-1	missense	T->I
II	7686221	G	A	SNV	coding_exon	F18A1.1	F18A1.1	missense	V->M
II	9224450	G	A	SNV	coding_exon	ZK1067.3	ZK1067.3	missense	A->T
II	11865792	C	T	SNV	coding_exon	K12D12.2	npp-3	missense	E->K
II	12443184	C	T	SNV	coding_exon	W05H5.1	W05H5.1	missense	A->T
II	12734437	C	T	SNV	coding_exon	Y46G5A.4	snrp-200	missense	E->K
II	14060773	G	A	SNV	coding_exon	W01G7.4	W01G7.4	missense	R->Q
II	14852825	G	A	SNV	coding_exon	R05H10.1	R05H10.1	missense	D->N
III	2673098	C	T	SNV	coding_exon	H19M22.2	let-805	missense	T->I
IV	3341745	C	T	SNV	coding_exon	F42A6.2	F42A6.2	missense	P->S
IV	3454688	C	T	SNV	coding_exon	F58E2.9	srz-23	missense	S->L
IV	14657306	G	A	SNV	coding_exon	Y57G11C.33	Y57G11C.33	missense	A->T
V	885235	C	T	SNV	coding_exon	T02B11.6	T02B11.6	missense	V->I
V	18465208	C	T	SNV	coding_exon	ZK228.4	ZK228.4	missense	A->V
X	1716763	C	T	SNV	coding_exon	F07G6.7	fbxa-53	missense	R->K
X	3556475	C	T	SNV	coding_exon	F56B6.2	rgs-7	missense	S->L
X	5825259	G	A	SNV	coding_exon	F13D11.2	hbl-1	missense	D->N
X	8665029	G	A	SNV	coding_exon	K09E2.4	rig-1	missense	G->E
X	11668814	G	A	SNV	coding_exon	T04F8.6	T04F8.6	missense	C->Y
X	13191271	G	A	SNV	coding_exon	F48C11.1	gpa-6	missense	R->Q
X	15230086	T	C	SNV	coding_exon	H03A11.2	H03A11.2	missense	Y->C
Sample 24-2 (Feb 5, 2016)
I	258132	G	C	SNV	coding_exon	Y48G1BR.1	Y48G1BR.1	missense	P->A
I	3735529	G	A	SNV	coding_exon	T12F5.5	larp-5	missense	R->W
I	4734613	C	A	SNV	coding_exon	C10H11.3	ugt-25	missense	S->Y
I	6377789	C	T	SNV	coding_exon	ZC308.1	gld-2	missense	P->L
I	8042450	G	A	SNV	coding_exon	K04G2.6	K04G2.6	missense	R->H
I	8874630	G	T	SNV	coding_exon	F55H12.1	snf-2	missense	C->F
I	10630259	C	G	SNV	coding_exon	B0511.5	cutl-14	missense	S->C
I	11742516	T	G	SNV	coding_exon	F35E2.5	F35E2.5	missense	K->T
I	12089659	C	A	SNV	coding_exon	Y47H10A.3	Y47H10A.3	missense	V->L
I	12929534	G	A	SNV	coding_exon	Y18D10A.21	Y18D10A.21	missense	S->N
I	14163613	C	T	SNV	coding_exon	C37A5.7	C37A5.7	missense	S->L
I	14706352	C	T	SNV	coding_exon	Y54E5A.4	npp-4	missense	A->T
I	14884897	C	T	SNV	coding_exon	ZK270.2	frm-1	missense	G->E
II	138219	T	C	SNV	intron	K10B4.1	K10B4.1	splicing
II	1734164	G	A	SNV	coding_exon	F45C12.15	ceh-83	missense	P->L
II	1869785	G	A	SNV	coding_exon	C16C4.4	math-14	missense	D->N
II	3154210	C	T	SNV	coding_exon	T10D4.12	sri-32	missense	V->M
III	65094	G	A	SNV	coding_exon	W05G11.6	W05G11.6	missense	A->V
III	156563	G	A	SNV	coding_exon	T17A3.10	T17A3.10	missense	P->S
III	1851047	C	T	SNV	coding_exon	Y39A3CR.7	pqn-82	nonsense	Q->*
III	1969331	C	T	SNV	coding_exon	R155.2	R155.2	missense	D->N
III	13440210	G	A	SNV	coding_exon	Y76A2A.2	cua-1	missense	S->F
III	13759108	G	C	SNV	coding_exon	K08E3.3	toca-2	missense	V->L
IV	237068	G	T	SNV	coding_exon	R02D3.4	R02D3.4	missense	A->D
IV	254920	G	A	SNV	coding_exon	R02D3.7	R02D3.7	missense	P->S
IV	669630	G	A	SNV	coding_exon	K11H12.11	K11H12.11	missense	P->S
IV	881675	G	A	SNV	coding_exon	Y55F3BR.1	Y55F3BR.1	missense	G->E
IV	5334545	G	A	SNV	coding_exon	Y4C6B.3	Y4C6B.3	nonsense	W->*
IV	5474299	G	A	SNV	coding_exon	T11F8.4	T11F8.4	missense	S->F
IV	8288563	C	T	SNV	coding_exon	K07H8.10	K07H8.10	missense	E->K
IV	9316002	C	T	SNV	coding_exon	F49C12.9	F49C12.9	missense	E->K
IV	10963063	G	A	SNV	coding_exon	Y69E1A.7	aqp-3	missense	S->L
V	2190929	C	T	SNV	coding_exon	Y5H2B.4	srbc-42	missense	A->T
V	11710125	C	T	SNV	coding_exon	W05E10.4	tre-3	missense	S->N
V	15337130	C	T	SNV	coding_exon	ZK1037.10	wrt-7	missense	V->I
V	17919133	C	T	SNV	coding_exon	C06H5.8	C06H5.8	missense	P->S
X	642833	G	A	SNV	coding_exon	M6.1	ifc-2	missense	H->Y
X	4167486	G	A	SNV	coding_exon	ZK470.1	ZK470.1	missense	D->N
X	5156746	C	T	SNV	coding_exon	C31H2.4	C31H2.4	missense	S->N
X	8380116	G	A	SNV	coding_exon	F41D9.1	tbc-18	missense	G->D
X	10574020	C	T	SNV	coding_exon	F57C7.1	bet-2	missense	S->L
X	10585635	T	A	SNV	coding_exon	F57C7.4	F57C7.4	missense	I->F
X	10669528	C	T	SNV	coding_exon	F13E6.2	F13E6.2	missense	D->N
X	17046955	A	T	SNV	coding_exon	C30G4.3	gcy-11	missense	C->S

## Sheet: All_Variants_Sorted
LG	Genomic Coordinate	Original Base	Changed Base	Type of Change	Location of Change	Gene Designation	Alternative Gene Designation	Type of Coding Change	Amino Acid Change
19	IV	12149171	C	T	SNV	coding_exon	B0001.2	B0001.2	missense	G->E
11	V	10316031	G	A	SNV	coding_exon	B0024.10	B0024.10	missense	P->S
32	I	5936916	G	A	SNV	coding_exon	B0207.6	B0207.6	missense	P->L
42	V	3970066	G	A	SNV	coding_exon	B0213.15	cyp-34A9	nonsense	Q->*
25	II	7742991	G	A	SNV	coding_exon	B0228.4	cpna-2	missense	V->I
11	II	4372482	C	T	SNV	coding_exon	B0286.3	B0286.3	missense	E->K
42	III	8718015	G	A	SNV	coding_exon	B0303.15	mrpl-11	missense	G->D
21	III	8691426	G	A	SNV	coding_exon	B0303.4	B0303.4	missense	E->K
19	V	9660491	G	A	SNV	coding_exon	B0331.2	B0331.2	missense	T->I
27	III	7283740	C	T	SNV	coding_exon	B0361.3	B0361.3	missense	L->F
24	V	13128361	G	A	SNV	coding_exon	B0365.3	eat-6	missense	T->I
11	V	19551423	G	A	SNV	coding_exon	B0399.2	oac-1	missense	P->S
42	II	268998	C	T	SNV	coding_exon	B0432.6	B0432.6	missense	D->N
11	V	18327074	C	T	SNV	coding_exon	B0462.1	B0462.1	missense	S->L
21	V	18328596	G	A	SNV	coding_exon	B0462.1	B0462.1	missense	M->I
11	II	7703620	C	T	SNV	coding_exon	B0495.7	B0495.7	missense	M->I
35	I	10656788	C	A	SNV	coding_exon	B0511.12	B0511.12	missense	A->S
22	I	10664038	G	A	SNV	coding_exon	B0511.12	B0511.12	missense	P->S
24-2	I	10630259	C	G	SNV	coding_exon	B0511.5	cutl-14	missense	S->C
11	IV	9105209	T	A	SNV	coding_exon	C01F6.4	fem-3	missense	V->E
27	IV	9128524	G	A	SNV	coding_exon	C01F6.6	tag-60	missense	V->I
11	V	3479892	A	T	SNV	coding_exon	C02A12.3	srbc-30	nonsense	C->*
23	III	7706019	C	T	SNV	coding_exon	C03B8.4	lin-13	missense	D->N
35	X	5399062	G	A	SNV	coding_exon	C03F11.3	scav-1	missense	H->Y
24	V	7363825	G	A	SNV	coding_exon	C03G6.15	cyp-35A2	missense	A->V
11	X	15692125	G	A	SNV	coding_exon	C03H12.1	C03H12.1	missense	D->N
42	X	13695391	G	A	SNV	coding_exon	C04A11.4	adm-2	missense	A->T
23	III	8508862	C	T	SNV	coding_exon	C04D8.1	pac-1	missense	H->Y
15	V	3359453	A	T	SNV	coding_exon	C04E12.5	C04E12.5	nonsense	K->*
15	V	5095768	A	T	SNV	intron	C04F5.2	C04F5.2	splicing
32	III	9998679	G	A	SNV	coding_exon	C05B5.17	C05B5.17	missense	P->S
23	III	10008416	C	T	SNV	coding_exon	C05B5.6	fbxa-155	missense	V->I
15	V	7230305	C	T	SNV	coding_exon	C05C8.4	gei-6	missense	R->K
24	V	7233118	G	A	SNV	coding_exon	C05C8.5	C05C8.5	missense	S->F
19	X	11149958	T	C	SNV	coding_exon	C05C9.3	C05C9.3	missense	H->R
25	X	1104666	G	A	SNV	coding_exon	C05D9.5	ife-4	missense	A->T
15	V	760901	A	C	SNV	coding_exon	C05E4.15	C05E4.15	missense	N->K
9	I	5981078	T	A	SNV	coding_exon	C06A5.4	madf-7	missense	T->S
11	V	15494235	T	G	SNV	coding_exon	C06B8.10	srh-218	missense	Y->D
23	III	7984578	C	T	SNV	coding_exon	C06G4.2	clp-1	missense	P->L
24	V	17919133	C	T	SNV	coding_exon	C06H5.8	C06H5.8	missense	P->S
24-2	V	17919133	C	T	SNV	coding_exon	C06H5.8	C06H5.8	missense	P->S
24	V	3504374	G	A	SNV	coding_exon	C07G3.9	ugt-64	missense	S->F
35	X	17088403	C	T	SNV	coding_exon	C08A9.3	C08A9.3	missense	G->R
35	X	17107448	T	A	SNV	coding_exon	C08A9.9	C08A9.9	missense	E->D
22	II	1789924	G	A	SNV	coding_exon	C08F1.3	fbxb-13	nonsense	W->*
21	II	14705673	G	A	SNV	coding_exon	C09F9.2	C09F9.2	missense	G->D
9	I	8110985	G	A	SNV	coding_exon	C09H6.2	lin-10	missense	R->W
11	X	16769159	T	C	SNV	coding_exon	C10E2.6	C10E2.6	missense	M->V
19	I	6290971	G	A	SNV	coding_exon	C10G11.6	C10G11.6	missense	R->H
24-2	I	4734613	C	A	SNV	coding_exon	C10H11.3	ugt-25	missense	S->Y
11	X	14309284	T	C	SNV	coding_exon	C11H1.3	C11H1.3	missense	I->M
21	V	12109916	G	A	SNV	coding_exon	C13C4.4	C13C4.4	nonsense	R->*
9	V	5002216	G	A	SNV	coding_exon	C13D9.3	srr-8	nonsense	W->*
24	V	5660461	G	A	SNV	coding_exon	C14C11.6	mut-14	missense	A->V
19	X	10222156	C	T	SNV	coding_exon	C14H10.3	C14H10.3	missense	A->T
11	I	12215026	G	A	SNV	coding_exon	C15C6.4	C15C6.4	missense	R->H
42	III	6386592	G	A	SNV	coding_exon	C16A3.3	let-716	missense	R->H
24	II	1869785	G	A	SNV	coding_exon	C16C4.4	math-14	missense	D->N
24-2	II	1869785	G	A	SNV	coding_exon	C16C4.4	math-14	missense	D->N
11	I	11611042	G	A	SNV	coding_exon	C17D12.7	C17D12.7	missense	P->S
23	II	3241313	A	C	SNV	coding_exon	C17F4.3	C17F4.3	missense	E->A
35	IV	6800445	C	T	SNV	coding_exon	C17H12.4	C17H12.4	missense	G->E
9	III	7695496	T	A	SNV	coding_exon	C18H2.4	C18H2.4	missense	H->Q
25	IV	593859	C	T	SNV	coding_exon	C18H7.4	C18H7.4	missense	A->V
35	III	6197663	A	T	SNV	coding_exon	C23G10.7	C23G10.7	nonsense	Y->*
35	III	6197888	G	A	SNV	coding_exon	C23G10.7	C23G10.7	missense	L->F
32	II	57209	C	T	SNV	coding_exon	C23H3.4	sptl-1	missense	T->I
42	II	55300	C	T	SNV	coding_exon	C23H3.7	tre-5	missense	R->K
25	V	9177140	G	A	SNV	coding_exon	C24B5.2	spas-1	missense	A->T
11	V	9178915	A	G	SNV	coding_exon	C24B5.3	ptr-1	missense	V->A
25	V	9180621	G	A	SNV	coding_exon	C24B5.3	ptr-1	missense	P->S
21	V	2729020	C	T	SNV	coding_exon	C24B9.1	str-33	missense	A->V
19	X	9098401	C	T	SNV	coding_exon	C25A11.4	ajm-1	missense	A->V
19	IV	12450875	C	T	SNV	coding_exon	C25G4.5	dpy-26	missense	D->N
11	IV	12458557	G	A	SNV	coding_exon	C25G4.7	C25G4.7	missense	G->E
11	X	1249697	G	A	SNV	coding_exon	C25G6.4	C25G6.4	missense	A->V
8	X	1252071	G	A	SNV	coding_exon	C25G6.5	npr-11	missense	A->V
27	II	5688965	C	T	SNV	intron	C25H3.11	C25H3.11	splicing
9	I	7503716	G	A	SNV	coding_exon	C26C6.8	C26C6.8	missense	L->F
15	II	8328814	T	A	SNV	coding_exon	C26D10.2	hel-1	missense	K->M
35	III	4936778	G	A	SNV	coding_exon	C26E6.6	mrps-18C	missense	S->N
19	II	5066372	G	A	SNV	coding_exon	C27A2.1	smc-5	missense	D->N
9	V	12154358	G	A	SNV	coding_exon	C27A7.9	C27A7.9	missense	L->F
11	IV	8907364	A	G	SNV	coding_exon	C27B7.7	C27B7.7	missense	I->V
8	III	7827183	G	A	SNV	coding_exon	C27D11.1	egl-45	missense	R->C
11	II	5184501	G	A	SNV	coding_exon	C27D6.4	crh-2	missense	S->L
32	III	4426354	C	T	SNV	intron	C28A5.6	C28A5.6	splicing
8	X	8827397	C	T	SNV	coding_exon	C28G1.5	C28G1.5	missense	E->K
15	III	7934728	A	T	SNV	coding_exon	C29E4.3	ran-2	missense	E->V
19	V	15348305	G	A	SNV	coding_exon	C29F3.5	clec-230	missense	S->F
9	IV	11227717	A	T	SNV	coding_exon	C29F4.2	C29F4.2	missense	D->E
23	III	91843	C	T	SNV	coding_exon	C29F9.7	pat-4	missense	G->E
24	X	17046955	A	T	SNV	coding_exon	C30G4.3	gcy-11	missense	C->S
24-2	X	17046955	A	T	SNV	coding_exon	C30G4.3	gcy-11	missense	C->S
9	V	14937954	G	T	SNV	coding_exon	C30G7.2	C30G7.2	missense	W->L
23	V	16316168	C	T	SNV	coding_exon	C31A11.9	str-214	missense	A->V
11	II	13646111	G	A	SNV	intron	C31C9.4	fbxa-168	splicing
24	X	5156746	C	T	SNV	coding_exon	C31H2.4	C31H2.4	missense	S->N
24-2	X	5156746	C	T	SNV	coding_exon	C31H2.4	C31H2.4	missense	S->N
23	I	5819391	C	T	SNV	coding_exon	C32F10.6	nhr-2	missense	G->R
8	II	2181606	G	A	SNV	coding_exon	C33C12.3	C33C12.3	missense	G->R
32	II	2184765	T	A	SNV	coding_exon	C33C12.8	C33C12.8	missense	Q->L
9	X	17268001	A	G	SNV	coding_exon	C33E10.6	C33E10.6	missense	D->G
19	X	17293511	C	T	SNV	coding_exon	C33E10.8	C33E10.8	missense	V->I
9	X	14073041	A	G	SNV	coding_exon	C33G3.4	C33G3.4	missense	Y->C
32	IV	7795510	G	A	SNV	coding_exon	C33H5.15	sgo-1	missense	P->S
9	I	10673475	T	C	SNV	coding_exon	C34B2.3	C34B2.3	missense	Y->H
19	I	10684723	G	A	SNV	coding_exon	C34B2.7	sdha-2	missense	S->L
19	X	11803190	T	A	SNV	coding_exon	C34E11.1	rsd-3	missense	F->Y
42	X	11804609	G	A	SNV	intron	C34E11.4	C34E11.4	splicing
11	II	5194475	C	T	SNV	coding_exon	C34F11.6	msp-49	missense	S->F
8	V	10492474	G	A	SNV	coding_exon	C35A5.1	aqp-5	missense	G->R
35	IV	4083825	C	T	SNV	coding_exon	C35B1.5	C35B1.5	missense	E->K
35	IV	4084175	C	T	SNV	coding_exon	C35B1.5	C35B1.5	missense	A->T
9	X	11534928	G	A	SNV	coding_exon	C35C5.8	C35C5.8	missense	E->K
15	III	4885833	G	A	SNV	coding_exon	C35D10.15	clec-6	missense	P->L
32	III	4885997	T	G	SNV	coding_exon	C35D10.15	clec-6	missense	K->N
32	III	4885998	T	A	SNV	coding_exon	C35D10.15	clec-6	missense	K->I
32	III	4885999	T	C	SNV	coding_exon	C35D10.15	clec-6	missense	K->E
22	I	8722678	G	A	SNV	coding_exon	C36B1.1	cle-1	missense	P->S
27	V	3143891	C	T	SNV	coding_exon	C36C5.7	srab-10	missense	R->K
24-2	I	14163613	C	T	SNV	coding_exon	C37A5.7	C37A5.7	missense	S->L
27	X	10463066	G	A	SNV	coding_exon	C39B10.1	C39B10.1	missense	L->F
42	III	2224866	G	A	SNV	coding_exon	C39B5.4	fbxa-38	missense	D->N
32	II	3016659	C	T	SNV	coding_exon	C41H7.1	C41H7.1	missense	S->F
21	IV	7167089	G	A	SNV	coding_exon	C42D4.18	C42D4.18	missense	M->I
19	X	5116248	C	T	SNV	coding_exon	C42D8.8	apl-1	missense	G->R
11	I	4250982	G	A	SNV	coding_exon	C43E11.11	cogc-5	missense	E->K
25	IV	1114775	C	T	SNV	coding_exon	C44B12.8	srx-14	missense	E->K
22	II	6862210	G	A	SNV	coding_exon	C44B7.3	aff-1	missense	T->I
9	X	981841	T	C	SNV	coding_exon	C44C1.1	C44C1.1	missense	S->P
24	X	11711709	G	A	SNV	coding_exon	C44C10.1	col-180	missense	A->V
42	X	11711775	G	A	SNV	coding_exon	C44C10.1	col-180	missense	P->L
42	X	11715514	G	A	SNV	coding_exon	C44C10.9	C44C10.9	missense	S->F
15	I	4613460	G	A	SNV	coding_exon	C44E4.1	C44E4.1	missense	R->C
35	X	14581929	C	T	SNV	coding_exon	C44H4.3	sym-1	missense	T->I
21	V	12837129	G	A	SNV	coding_exon	C44H9.4	C44H9.4	missense	R->K
11	V	11045630	G	A	SNV	coding_exon	C45B11.6	C45B11.6	missense	D->N
11	X	6086309	G	A	SNV	coding_exon	C45B2.1	C45B2.1	missense	G->D
9	III	5057571	T	C	SNV	coding_exon	C45G9.10	C45G9.10	missense	E->G
35	V	2155752	G	A	SNV	coding_exon	C45H4.7	srbc-21	missense	A->T
11	IV	9210598	T	A	SNV	coding_exon	C46C2.1	wnk-1	missense	D->E
32	IV	9205603	G	A	SNV	coding_exon	C46C2.1	wnk-1	missense	S->N
24	V	17760408	C	T	SNV	coding_exon	C47A10.1	pgp-9	missense	A->V
32	V	17760450	G	A	SNV	coding_exon	C47A10.1	pgp-9	missense	R->Q
11	V	17766646	G	A	SNV	coding_exon	C47A10.2	srh-283	missense	A->T
21	I	12983214	C	T	SNV	coding_exon	C47B2.9	C47B2.9	nonsense	R->*
21	II	11673553	C	T	SNV	coding_exon	C47D12.1	trr-1	missense	R->Q
32	II	11663462	C	T	SNV	coding_exon	C47D12.1	trr-1	missense	R->Q
32	IV	7417768	G	A	SNV	coding_exon	C48A7.1	egl-19	missense	M->I
19	X	8959783	C	T	SNV	intron	C48C5.3	aexr-3	splicing
19	I	6242316	G	A	SNV	coding_exon	C48E7.6	C48E7.6	nonsense	W->*
8	I	6266689	C	T	SNV	coding_exon	C48E7.8	oac-9	missense	A->T
19	V	13311858	G	A	SNV	coding_exon	C50B6.2	nasp-2	missense	P->S
19	III	8183334	G	A	SNV	coding_exon	C50C3.2	C50C3.2	missense	E->K
19	III	8160945	G	A	SNV	coding_exon	C50C3.7	cil-1	missense	T->I
42	V	9532113	C	T	SNV	coding_exon	C50F4.2	C50F4.2	missense	S->F
21	II	1854885	G	T	SNV	coding_exon	C52E2.1	fbxb-95	missense	R->L
9	IV	8967487	A	T	SNV	coding_exon	C53B4.2	C53B4.2	missense	T->S
11	I	12453891	G	A	SNV	coding_exon	C54C8.5	glct-5	missense	R->K
24	V	7541885	G	A	SNV	coding_exon	C54F6.13	nhx-3	missense	S->L
15	V	7510595	T	C	SNV	coding_exon	C54F6.9	nhr-172	missense	M->T
42	III	5545015	G	A	SNV	coding_exon	D1044.1	D1044.1	missense	V->I
42	III	5532027	G	A	SNV	coding_exon	D1044.2	D1044.2	missense	G->D
24	X	8560063	G	A	SNV	coding_exon	D2021.1	utx-1	missense	E->K
23	I	7598900	C	T	SNV	coding_exon	D2030.9	wdr-23	missense	L->F
19	II	8660920	G	A	SNV	coding_exon	D2085.6	D2085.6	missense	S->F
27	IV	8364724	A	G	SNV	coding_exon	D2096.12	D2096.12	missense	I->V
11	V	17921880	G	A	SNV	coding_exon	E01B7.2	E01B7.2	missense	E->K
25	V	12587586	G	A	SNV	coding_exon	E02A10.3	E02A10.3	missense	V->I
15	X	14278710	A	T	SNV	coding_exon	E02H4.2	E02H4.2	missense	L->M
8	II	5421710	C	T	SNV	coding_exon	EEED8.1	mel-47	missense	S->L
9	IV	10241752	C	T	SNV	coding_exon	F01G10.7	lipl-7	missense	S->N
27	III	9084953	G	A	SNV	coding_exon	F02A9.4	F02A9.4	missense	R->C
9	X	13453953	T	C	SNV	coding_exon	F02D10.5	flr-1	missense	D->G
11	I	8415106	G	A	SNV	coding_exon	F02E9.7	F02E9.7	missense	D->N
24	X	695253	T	A	SNV	coding_exon	F02G3.1	ncam-1	missense	I->K
24	X	695616	G	A	SNV	coding_exon	F02G3.1	ncam-1	missense	M->I
8	IV	14219241	GAAAAAAAAA	GAAAAAAAA	deletion	coding_exon	F02H6.4	F02H6.4	frameshift
22	X	1716763	C	T	SNV	coding_exon	F07G6.7	fbxa-53	missense	R->K
42	I	12939889	C	T	SNV	coding_exon	F08A8.1	acox-1	missense	L->F
11	X	7591635	C	T	SNV	coding_exon	F08C6.1	adt-2	missense	P->L
11	II	2771292	A	G	SNV	coding_exon	F08D12.9	sdz-10	missense	V->A
23	X	8437199	G	A	SNV	coding_exon	F08F1.1	kin-9	missense	E->K
11	X	8411698	A	G	SNV	coding_exon	F08F1.4	F08F1.4	start_ATG	M->V
9	III	7358588	C	T	SNV	coding_exon	F08F8.4	F08F8.4	missense	D->N
27	X	16146430	G	A	SNV	coding_exon	F09C8.2	F09C8.2	missense	A->V
9	III	5549805	A	G	SNV	coding_exon	F09F7.5	F09F7.5	missense	D->G
8	V	7177438	G	A	SNV	coding_exon	F09G2.5	lgc-39	missense	D->N
23	II	8164616	C	A	SNV	coding_exon	F10B5.7	rrf-3	missense	L->M
27	II	8165224	G	A	SNV	coding_exon	F10B5.7	rrf-3	missense	V->I
22	I	8444570	G	A	SNV	coding_exon	F10D11.5	F10D11.5	missense	P->S
32	III	4598664	T	A	SNV	coding_exon	F10F2.1	sel-2	missense	N->Y
27	II	4710827	C	T	SNV	coding_exon	F10G7.1	tag-151	missense	S->L
19	IV	12095014	C	T	SNV	coding_exon	F11A10.5	F11A10.5	nonsense	Q->*
15	X	12991096	A	G	SNV	coding_exon	F11C1.7	F11C1.7	missense	I->V
35	X	17411709	C	T	SNV	coding_exon	F11C7.4	crb-1	missense	G->D
15	V	18741023	C	T	SNV	coding_exon	F11D11.14	clec-250	missense	R->K
24	IV	11554824	A	T	SNV	coding_exon	F12F6.8	F12F6.8	missense	N->K
11	IV	10445490	A	T	SNV	coding_exon	F13B12.4	F13B12.4	missense	Y->N
22	X	5825259	G	A	SNV	coding_exon	F13D11.2	hbl-1	missense	D->N
24	X	10669528	C	T	SNV	coding_exon	F13E6.2	F13E6.2	missense	D->N
24-2	X	10669528	C	T	SNV	coding_exon	F13E6.2	F13E6.2	missense	D->N
35	IV	10896231	G	A	SNV	coding_exon	F13E9.4	F13E9.4	nonsense	Q->*
11	V	6361583	T	C	SNV	coding_exon	F13H6.1	F13H6.1	missense	M->T
11	II	8426678	T	A	SNV	coding_exon	F14E5.2	F14E5.2	missense	H->L
25	V	5138408	G	A	SNV	coding_exon	F14F9.3	F14F9.3	missense	D->N
32	V	5135810	G	A	SNV	intron	F14F9.4	F14F9.4	splicing
15	X	4364150	A	T	SNV	coding_exon	F14H12.8	F14H12.8	missense	L->H
21	X	13473877	C	T	SNV	coding_exon	F15A2.2	tre-4	missense	S->F
21	V	13023319	G	A	SNV	coding_exon	F15B9.7	fmi-1	missense	G->E
15	X	9751931	A	G	SNV	coding_exon	F15G9.4	him-4	missense	I->V
35	X	14100633	C	T	SNV	coding_exon	F16B12.5	F16B12.5	missense	L->F
11	I	8366992	G	A	SNV	coding_exon	F16D3.4	F16D3.4	missense	A->V
27	V	18199398	C	T	SNV	coding_exon	F16H6.4	F16H6.4	missense	P->S
32	V	18205578	G	A	SNV	coding_exon	F16H6.6	F16H6.6	missense	R->K
25	V	18221818	G	A	SNV	coding_exon	F16H6.9	F16H6.9	missense	G->E
11	V	10952447	A	G	SNV	coding_exon	F17C11.4	F17C11.4	missense	H->R
11	X	12396543	G	A	SNV	coding_exon	F17E5.2	F17E5.2	missense	R->K
22	II	7686221	G	A	SNV	coding_exon	F18A1.1	F18A1.1	missense	V->M
9	II	3417121	A	G	SNV	coding_exon	F18A12.1	F18A12.1	missense	D->G
15	I	8098014	G	A	SNV	coding_exon	F18C12.3	F18C12.3	missense	E->K
21	V	7433864	C	T	SNV	coding_exon	F18E3.7	ddo-2	nonsense	W->*
27	IV	12334054	C	T	SNV	coding_exon	F19B6.1	F19B6.1	missense	D->N
24	IV	8761984	TTAT	TT	deletion	coding_exon	F20C5.2	klp-11	frameshift
9	IV	8772238	C	T	SNV	coding_exon	F20C5.6	F20C5.6	missense	E->K
9	V	17468960	T	G	SNV	coding_exon	F20E11.17	F20E11.17	missense	D->A
42	V	13764671	T	G	SNV	coding_exon	F20G2.6	F20G2.6	missense	F->V
15	I	7924205	A	G	SNV	coding_exon	F20G4.1	smgl-1	missense	I->T
27	III	6596652	C	T	SNV	coding_exon	F20H11.2	let-765	missense	V->I
23	I	4897983	C	T	SNV	coding_exon	F21F3.5	unc-38	missense	A->T
42	III	8629007	G	A	SNV	coding_exon	F22B7.13	gpr-1	missense	M->I
24	I	13167299	G	A	SNV	coding_exon	F22G12.5	F22G12.5	missense	R->K
11	X	14450706	T	C	SNV	coding_exon	F23D12.5	jmjd-3.2	missense	Y->H
21	V	8562449	G	A	SNV	coding_exon	F25G6.3	acr-16	missense	V->M
24	I	10572099	G	A	SNV	coding_exon	F25H2.13	rtel-1	missense	E->K
9	I	9210327	G	A	SNV	coding_exon	F25H5.1	lim-9	missense	S->F
32	II	9906705	C	T	SNV	coding_exon	F26C11.3	F26C11.3	missense	A->T
24	IV	17272685	G	A	SNV	coding_exon	F26D10.10	gln-5	missense	T->I
32	III	4896080	G	A	SNV	coding_exon	F26F4.7	nhl-2	missense	S->F
32	II	14396078	G	A	SNV	coding_exon	F26H11.2	nurf-1	missense	E->K
19	X	7653154	C	T	SNV	coding_exon	F27D9.4	F27D9.4	missense	R->Q
11	V	15572634	G	A	SNV	coding_exon	F28F8.4	fbxa-95	missense	V->I
11	II	2753655	G	A	SNV	coding_exon	F29A7.3	F29A7.3	missense	A->T
11	II	13109158	T	A	SNV	coding_exon	F29C12.1	pqn-32	missense	F->I
11	II	13112965	G	A	SNV	coding_exon	F29C12.3	rict-1	missense	T->I
9	X	11514395	T	A	SNV	coding_exon	F29G6.3	hpo-34	missense	D->V
19	X	10797011	C	T	SNV	coding_exon	F31B12.1	plc-1	missense	D->N
15	X	10825413	T	C	SNV	coding_exon	F31B12.3	frm-9	missense	I->V
9	X	15915914	T	C	SNV	coding_exon	F31B9.4	F31B9.4	missense	Y->C
27	II	4212491	A	T	SNV	coding_exon	F31D5.7	F31D5.7	missense	I->F
15	III	6967100	C	T	SNV	coding_exon	F31E3.4	panl-2	missense	R->K
19	III	6967011	G	A	SNV	coding_exon	F31E3.4	panl-2	missense	P->S
21	V	668995	C	T	SNV	coding_exon	F31F4.13	sru-24	missense	E->K
8	II	7234739	C	T	SNV	coding_exon	F32A5.3	F32A5.3	nonsense	Q->*
42	X	5293005	C	T	SNV	coding_exon	F32A6.4	ags-3	missense	D->N
9	I	11502560	C	T	SNV	coding_exon	F32B4.8	F32B4.8	missense	T->I
9	I	11504369	T	A	SNV	coding_exon	F32B4.8	F32B4.8	missense	N->K
21	V	10902015	G	A	SNV	coding_exon	F32D8.8	F32D8.8	missense	P->L
22	II	2587508	C	T	SNV	coding_exon	F33H12.2	sri-39	missense	S->L
9	V	11601848	G	A	SNV	coding_exon	F35B12.9	F35B12.9	missense	V->I
42	I	9809472	G	A	SNV	coding_exon	F35C12.2	ncx-4	missense	D->N
11	II	12904937	T	C	SNV	coding_exon	F35C5.9	clec-66	missense	L->P
24-2	I	11742516	T	G	SNV	coding_exon	F35E2.5	F35E2.5	missense	K->T
24	V	15912680	C	T	SNV	coding_exon	F35E8.6	F35E8.6	missense	A->V
42	III	4574526	G	A	SNV	coding_exon	F35G12.3	sel-5	nonsense	R->*
21	II	9583355	C	T	SNV	coding_exon	F35H8.7	wee-1.1	missense	S->N
35	I	8829573	G	A	SNV	coding_exon	F36A2.13	F36A2.13	missense	L->F
27	IV	4253120	C	T	SNV	coding_exon	F36A4.7	ama-1	missense	L->F
11	V	16528246	T	G	SNV	coding_exon	F36D3.8	F36D3.8	missense	I->S
15	V	9417891	C	T	SNV	coding_exon	F36D4.1	F36D4.1	missense	S->F
25	I	9002118	C	T	SNV	coding_exon	F36F2.4	syx-7	missense	A->T
19	III	6695829	G	A	SNV	coding_exon	F37A4.7	rbf-1	missense	R->Q
19	IV	1234782	C	T	SNV	coding_exon	F38A1.8	F38A1.8	missense	A->T
42	V	20755407	A	T	SNV	coding_exon	F38A6.1	pha-4	missense	T->S
21	V	20783345	T	G	SNV	coding_exon	F38A6.3	hif-1	missense	D->E
42	IV	16276907	G	A	SNV	coding_exon	F38C2.7	F38C2.7	missense	S->L
11	X	16466584	T	C	SNV	coding_exon	F38E9.2	nas-39	missense	I->T
9	IV	11859135	C	T	SNV	coding_exon	F38H4.9	let-92	missense	S->F
27	X	835999	G	A	SNV	coding_exon	F39H12.1	F39H12.1	missense	E->K
11	V	17166955	C	T	SNV	coding_exon	F40D4.9	srz-66	missense	V->I
11	II	11126035	T	G	SNV	coding_exon	F40F8.10	rps-9	missense	M->L
32	II	11131679	C	T	SNV	coding_exon	F40F8.11	F40F8.11	missense	A->T
11	III	197174	A	G	SNV	coding_exon	F40G9.17	F40G9.17	missense	T->A
11	II	6168556	C	T	SNV	coding_exon	F40H3.5	hst-3.1	missense	D->N
27	V	2253369	C	T	SNV	coding_exon	F41B5.8	str-253	missense	G->E
24-2	X	8380116	G	A	SNV	coding_exon	F41D9.1	tbc-18	missense	G->D
21	V	8595178	G	A	SNV	coding_exon	F41E6.6	tag-196	missense	R->K
32	II	6771713	C	T	SNV	intron	F41G3.12	agr-1	splicing
9	IV	5373164	T	C	SNV	intron	F41H10.3	F41H10.3	splicing
22	IV	3341745	C	T	SNV	coding_exon	F42A6.2	F42A6.2	missense	P->S
27	IV	7322899	C	T	SNV	coding_exon	F42C5.10	ttm-4	missense	V->I
24	V	8028446	G	A	SNV	coding_exon	F43H9.4	F43H9.4	missense	G->E
11	V	2222661	G	A	SNV	intron	F44C8.5	nhr-128	splicing
27	IV	10029230	G	A	SNV	coding_exon	F44D12.5	msd-2	missense	G->R
11	V	16139483	A	G	SNV	intron	F44G3.10	F44G3.10	splicing
21	V	16104910	G	A	SNV	intron	F44G3.2	F44G3.2	splicing
24	II	1734164	G	A	SNV	coding_exon	F45C12.15	ceh-83	missense	P->L
24-2	II	1734164	G	A	SNV	coding_exon	F45C12.15	ceh-83	missense	P->L
11	IV	7646120	A	C	SNV	coding_exon	F45E4.9	hmg-5	missense	N->K
32	III	3383137	C	T	SNV	coding_exon	F45H7.6	hecw-1	missense	R->K
32	I	11242917	G	A	SNV	coding_exon	F46A8.3	F46A8.3	missense	T->I
9	I	9465153	C	T	SNV	coding_exon	F46A9.3	twk-29	missense	T->I
25	V	20631106	G	A	SNV	coding_exon	F46B3.14	F46B3.14	missense	P->S
23	X	11427516	G	A	SNV	coding_exon	F46C3.3	hum-4	missense	P->S
8	I	5617607	C	T	SNV	coding_exon	F46F11.6	F46F11.6	missense	V->I
11	X	7238629	A	T	SNV	coding_exon	F46H5.3	F46H5.3	missense	F->I
11	X	9811455	C	T	SNV	coding_exon	F47A4.2	dpy-22	missense	G->R
15	X	9825862	A	G	SNV	coding_exon	F47A4.3	rrc-1	missense	S->P
8	X	3776860	G	A	SNV	coding_exon	F47B7.2	F47B7.2	missense	G->R
15	V	3845826	A	C	SNV	coding_exon	F47C10.1	nhr-185	missense	D->E
23	V	4278561	C	T	SNV	coding_exon	F47D2.7	srt-20	missense	R->K
11	I	14066464	G	A	SNV	coding_exon	F47G4.4	F47G4.4	missense	T->I
32	V	17353892	G	A	SNV	coding_exon	F47H4.2	F47H4.2	nonsense	W->*
25	II	209496	C	T	SNV	coding_exon	F48A11.1	chs-2	missense	S->L
25	X	2176259	G	A	SNV	coding_exon	F48B9.8	F48B9.8	missense	A->V
15	I	5331625	T	C	SNV	coding_exon	F48C1.7	spe-11	missense	H->R
22	X	13191271	G	A	SNV	coding_exon	F48C11.1	gpa-6	missense	R->Q
15	X	4247098	C	T	SNV	coding_exon	F48D6.4	F48D6.4	missense	A->T
11	III	5458519	C	T	SNV	coding_exon	F48E8.4	F48E8.4	missense	S->L
15	V	16865825	A	G	SNV	coding_exon	F49A5.5	clec-28	missense	M->V
24	IV	9316002	C	T	SNV	coding_exon	F49C12.9	F49C12.9	missense	E->K
24-2	IV	9316002	C	T	SNV	coding_exon	F49C12.9	F49C12.9	missense	E->K
42	X	5872243	C	T	SNV	coding_exon	F49E10.5	ctbp-1	missense	L->F
42	X	5872517	C	T	SNV	coding_exon	F49E10.5	ctbp-1	missense	A->V
25	I	8297311	C	T	SNV	coding_exon	F52B5.1	abts-1	missense	D->N
11	II	1927023	G	A	SNV	coding_exon	F52C6.2	F52C6.2	missense	V->I
24	X	16277189	G	A	SNV	coding_exon	F52E10.1	sdc-1	missense	G->R
23	II	10036273	G	A	SNV	coding_exon	F52H3.1	let-268	missense	L->F
35	I	8932101	G	A	SNV	coding_exon	F53B6.2	madd-4	missense	S->F
9	I	8955342	G	A	SNV	coding_exon	F53B6.6	cutl-7	missense	P->S
21	V	11001225	G	A	SNV	coding_exon	F53B7.4	F53B7.4	missense	P->S
21	V	10971712	G	A	SNV	coding_exon	F53B7.5	fig-1	nonsense	Q->*
9	V	13626162	C	T	SNV	coding_exon	F53F4.12	F53F4.12	missense	T->M
15	I	140481	G	A	SNV	coding_exon	F53G12.3	duox-2	missense	V->I
42	V	15829711	C	T	SNV	coding_exon	F54B8.16	srbc-55	missense	M->I
24	III	81940	G	A	SNV	coding_exon	F54C4.3	attf-3	missense	P->S
35	III	9438414	G	A	SNV	coding_exon	F54C8.3	emb-30	missense	T->M
9	IV	11290410	T	C	SNV	coding_exon	F54D1.6	F54D1.6	missense	I->T
21	V	4625840	C	T	SNV	coding_exon	F54D11.2	F54D11.2	missense	L->F
32	II	1381697	C	T	SNV	coding_exon	F54D12.9	F54D12.9	start_ATG	M->I
24	III	5678091	C	T	SNV	coding_exon	F54E7.8	F54E7.8	missense	G->S
23	X	11854815	G	A	SNV	coding_exon	F54F7.8	F54F7.8	missense	P->L
11	II	6624692	C	A	SNV	coding_exon	F54H5.5	F54H5.5	nonsense	E->*
24	I	5346598	A	T	SNV	intron	F55A12.5	F55A12.5	splicing
9	V	13836436	G	A	SNV	intron	F55B12.9	srx-129	splicing
21	V	11383224	C	T	SNV	coding_exon	F55C10.5	F55C10.5	nonsense	R->*
9	I	5651842	G	A	SNV	coding_exon	F55F8.3	F55F8.3	missense	P->S
8	I	5652157	C	T	SNV	coding_exon	F55F8.3	F55F8.3	missense	A->T
11	IV	7478832	G	A	SNV	coding_exon	F55G1.4	rod-1	missense	G->E
24-2	I	8874630	G	T	SNV	coding_exon	F55H12.1	snf-2	missense	C->F
8	I	5177879	C	T	SNV	coding_exon	F56A3.3	npp-6	missense	P->S
23	I	606804	C	T	SNV	coding_exon	F56A6.2	hum-7	missense	G->D
15	III	13261695	C	T	SNV	coding_exon	F56A8.3	F56A8.3	missense	T->I
22	X	3556475	C	T	SNV	coding_exon	F56B6.2	rgs-7	missense	S->L
24	III	5590143	T	C	SNV	coding_exon	F56D2.6	F56D2.6	missense	N->D
8	IV	3926758	G	A	SNV	coding_exon	F56D6.1	clec-68	missense	E->K
27	X	3172034	G	A	SNV	coding_exon	F56E3.3	klp-4	missense	T->I
35	X	863047	G	A	SNV	coding_exon	F56F10.3	cdo-1	missense	P->L
8	III	2879664	C	T	SNV	coding_exon	F56F11.3	klf-1	missense	T->I
19	I	12284987	G	A	SNV	coding_exon	F56H6.13	F56H6.13	nonsense	W->*
8	III	6934792	C	T	SNV	coding_exon	F57B9.8	F57B9.8	missense	G->E
24	X	10574020	C	T	SNV	coding_exon	F57C7.1	bet-2	missense	S->L
24-2	X	10574020	C	T	SNV	coding_exon	F57C7.1	bet-2	missense	S->L
24	X	10585635	T	A	SNV	coding_exon	F57C7.4	F57C7.4	missense	I->F
24-2	X	10585635	T	A	SNV	coding_exon	F57C7.4	F57C7.4	missense	I->F
24	V	12011531	G	A	SNV	coding_exon	F57F5.4	add-2	nonsense	Q->*
11	V	17629191	C	G	SNV	coding_exon	F57G4.10	F57G4.10	missense	A->G
22	IV	3454688	C	T	SNV	coding_exon	F58E2.9	srz-23	missense	S->L
15	II	6390591	T	A	SNV	coding_exon	F58F12.3	F58F12.3	nonsense	K->*
27	IV	6237527	C	T	SNV	coding_exon	F58F9.6	F58F9.6	missense	C->Y
9	V	11935357	G	A	SNV	coding_exon	F58H1.8	F58H1.8	missense	A->T
15	V	3635201	A	C	SNV	coding_exon	F59B1.7	srx-41	missense	I->S
15	V	3658047	A	T	SNV	coding_exon	F59B1.9	acr-23	nonsense	Y->*
8	X	15650843	A	T	SNV	coding_exon	F59D12.3	F59D12.3	missense	N->K
8	II	5647004	C	T	SNV	coding_exon	F59E12.9	F59E12.9	missense	A->T
35	X	10996470	G	A	SNV	coding_exon	F59F3.1	ver-3	missense	D->N
32	X	15230086	T	C	SNV	coding_exon	H03A11.2	H03A11.2	missense	Y->C
22	X	15230086	T	C	SNV	coding_exon	H03A11.2	H03A11.2	missense	Y->C
24	III	10438240	T	G	SNV	coding_exon	H04D03.6	H04D03.6	missense	D->A
11	IV	4812901	A	G	SNV	coding_exon	H06H21.2	srw-95	missense	I->V
19	III	3069114	G	A	SNV	coding_exon	H06I04.4	ubl-1	missense	A->T
8	II	1491399	C	T	SNV	coding_exon	H17B01.4	H17B01.4	missense	A->T
11	III	2665231	A	T	SNV	coding_exon	H19M22.2	let-805	readthrough	*->C
35	III	2666605	C	T	SNV	coding_exon	H19M22.2	let-805	missense	T->I
22	III	2673098	C	T	SNV	coding_exon	H19M22.2	let-805	missense	T->I
9	IV	6831547	G	A	SNV	coding_exon	H20E11.1	H20E11.1	missense	V->I
9	IV	8715762	G	A	SNV	coding_exon	H23L24.2	H23L24.2	missense	V->M
9	V	2939913	C	T	SNV	coding_exon	H27D07.3	srw-143	missense	G->E
32	I	6844165	G	A	SNV	coding_exon	H27M09.4	dpy-14	missense	E->K
15	I	6846525	G	A	SNV	coding_exon	H27M09.5	H27M09.5	missense	R->W
8	III	4324843	T	A	SNV	coding_exon	H38K22.5	gly-6	missense	N->Y
9	V	12385397	G	A	SNV	coding_exon	K01D12.3	K01D12.3	missense	E->K
21	III	10760186	C	T	SNV	coding_exon	K01G5.9	K01G5.9	nonsense	R->*
35	III	10761634	G	A	SNV	coding_exon	K01G5.9	K01G5.9	missense	G->S
42	III	10759797	G	A	SNV	coding_exon	K01G5.9	K01G5.9	missense	G->R
8	III	10760382	G	A	SNV	coding_exon	K01G5.9	K01G5.9	missense	A->T
27	II	7409884	G	A	SNV	coding_exon	K02A2.2	srd-55	missense	G->E
19	II	8086458	G	A	SNV	coding_exon	K02C4.3	K02C4.3	missense	S->L
8	II	1060368	C	T	SNV	coding_exon	K02E7.9	btb-10	missense	R->H
21	V	4667778	C	T	SNV	coding_exon	K03B4.5	srx-77	missense	G->S
8	V	17494349	G	A	SNV	coding_exon	K03D7.6	srh-118	missense	P->L
27	V	6535926	C	T	SNV	intron	K04A8.6	dre-1	splicing
15	V	1660321	A	G	SNV	coding_exon	K04F1.11	K04F1.11	missense	I->V
24	V	1644665	C	T	SNV	coding_exon	K04F1.15	alh-2	missense	A->V
35	X	14350820	C	T	SNV	coding_exon	K04G11.4	wdr-5.2	missense	P->S
24-2	I	8042450	G	A	SNV	coding_exon	K04G2.6	K04G2.6	missense	R->H
19	III	9353608	G	A	SNV	coding_exon	K04H4.2	K04H4.2	missense	R->C
35	I	14255967	C	T	SNV	coding_exon	K04H8.3	K04H8.3	missense	A->V
42	V	16173973	C	T	SNV	coding_exon	K05D4.4	cyp-33D1	missense	E->K
9	II	6442258	T	C	SNV	coding_exon	K06A1.3	cutl-16	missense	S->P
9	I	6461423	G	A	SNV	coding_exon	K06A5.4	knl-2	missense	M->I
42	V	10357224	C	T	SNV	coding_exon	K07C5.5	ceeh-2	missense	M->I
15	III	6788571	G	A	SNV	coding_exon	K07E12.1	dig-1	missense	V->I
24	III	6789739	C	T	SNV	coding_exon	K07E12.1	dig-1	missense	P->L
23	I	7164152	C	T	SNV	coding_exon	K07G5.3	mks-6	missense	P->L
24	IV	8288563	C	T	SNV	coding_exon	K07H8.10	K07H8.10	missense	E->K
24-2	IV	8288563	C	T	SNV	coding_exon	K07H8.10	K07H8.10	missense	E->K
9	I	11487974	C	T	SNV	coding_exon	K08C9.2	K08C9.2	missense	D->N
24-2	III	13759108	G	C	SNV	coding_exon	K08E3.3	toca-2	missense	V->L
11	IV	12053210	G	A	SNV	coding_exon	K08E4.1	spt-5	missense	V->I
42	IV	13435373	G	A	SNV	coding_exon	K09B11.10	mam-3	missense	T->I
42	X	10977809	G	A	SNV	coding_exon	K09C8.5	pxn-2	missense	P->S
22	X	8665029	G	A	SNV	coding_exon	K09E2.4	rig-1	missense	G->E
19	II	2263290	G	A	SNV	coding_exon	K09F6.4	K09F6.4	missense	A->V
24	II	138219	T	C	SNV	intron	K10B4.1	K10B4.1	splicing
24-2	II	138219	T	C	SNV	intron	K10B4.1	K10B4.1	splicing
15	II	127469	T	C	SNV	coding_exon	K10B4.5	srd-3	missense	T->A
35	I	9849088	G	A	SNV	coding_exon	K10C3.3	zig-1	missense	V->I
11	I	9865928	T	C	SNV	coding_exon	K10C3.5	K10C3.5	missense	M->T
9	V	17287524	C	G	SNV	coding_exon	K10G4.9	srw-30	missense	L->V
21	II	14499211	G	A	SNV	coding_exon	K10H10.3	dhs-8	missense	G->E
11	V	5063929	T	C	SNV	coding_exon	K11D12.10	mlk-1	missense	E->G
11	X	13751278	T	C	SNV	coding_exon	K11E4.5	nhr-71	missense	M->T
24-2	IV	669630	G	A	SNV	coding_exon	K11H12.11	K11H12.11	missense	P->S
22	II	11865792	C	T	SNV	coding_exon	K12D12.2	npp-3	missense	E->K
11	V	12230175	T	A	SNV	coding_exon	K12F2.1	myo-3	missense	T->S
24	II	2826545	C	T	SNV	coding_exon	K12H6.5	K12H6.5	missense	M->I
42	IV	14438682	G	A	SNV	coding_exon	LLC1.1	tra-3	missense	H->Y
35	I	3084828	C	T	SNV	coding_exon	M01B12.4	M01B12.4	missense	D->N
35	IV	3796438	C	T	SNV	coding_exon	M02B7.3	osm-3	missense	R->Q
9	X	3028678	G	A	SNV	coding_exon	M02F4.1	M02F4.1	missense	S->F
15	II	4597733	C	T	SNV	coding_exon	M03A1.6	ipla-1	missense	R->K
11	X	6820541	C	T	SNV	coding_exon	M03A8.4	gei-15	missense	A->T
24	X	13842576	G	A	SNV	coding_exon	M03B6.1	M03B6.1	missense	G->E
32	V	13382807	G	A	SNV	coding_exon	M04G12.2	cpz-2	missense	G->R
23	II	8226901	G	A	SNV	coding_exon	M110.5	dab-1	missense	A->T
27	III	10923845	G	A	SNV	coding_exon	M142.4	vab-7	missense	E->K
19	IV	12116926	C	T	SNV	coding_exon	M18.5	ddb-1	missense	M->I
35	IV	15119680	G	A	SNV	coding_exon	M199.3	clec-188	missense	E->K
24	X	642833	G	A	SNV	coding_exon	M6.1	ifc-2	missense	H->Y
24-2	X	642833	G	A	SNV	coding_exon	M6.1	ifc-2	missense	H->Y
15	IV	11079377	A	G	SNV	coding_exon	M7.5	atg-7	missense	Y->H
23	MtDNA	8121	C	T	SNV	coding_exon	MTCE.26	MTCE.26	missense	L->F
11	X	13547746	G	A	SNV	coding_exon	R01E6.1	odr-1	missense	L->F
19	X	13545558	C	T	SNV	coding_exon	R01E6.1	odr-1	missense	G->D
27	III	10258928	G	A	SNV	coding_exon	R01H10.6	bbs-5	missense	P->S
11	IV	234484	T	A	SNV	coding_exon	R02D3.4	R02D3.4	nonsense	K->*
24-2	IV	237068	G	T	SNV	coding_exon	R02D3.4	R02D3.4	missense	A->D
24-2	IV	254920	G	A	SNV	coding_exon	R02D3.7	R02D3.7	missense	P->S
9	V	14513505	G	A	SNV	coding_exon	R02D5.6	R02D5.6	missense	T->I
23	V	4804175	C	T	SNV	coding_exon	R02F11.3	R02F11.3	missense	G->R
21	X	15448656	A	G	SNV	coding_exon	R03A10.5	R03A10.5	missense	E->G
9	V	9005902	G	A	SNV	coding_exon	R03H4.3	srx-3	missense	V->M
42	V	10096600	C	T	SNV	coding_exon	R04B5.9	ugt-47	missense	R->Q
22	II	14852825	G	A	SNV	coding_exon	R05H10.1	R05H10.1	missense	D->N
15	III	973847	A	T	SNV	coding_exon	R06B10.2	R06B10.2	missense	D->E
9	I	7245720	G	A	SNV	coding_exon	R06C7.4	cpg-3	missense	G->E
11	X	9870167	G	A	SNV	intron	R07B1.13	R07B1.13	splicing
21	V	12067840	G	A	SNV	coding_exon	R07B7.4	R07B7.4	missense	H->Y
11	X	10339965	C	T	SNV	coding_exon	R07E3.1	R07E3.1	nonsense	W->*
42	III	8973116	G	A	SNV	coding_exon	R08D7.4	R08D7.4	missense	D->N
24	V	3773992	G	A	SNV	coding_exon	R08E5.3	R08E5.3	missense	D->N
11	X	17531524	C	T	SNV	coding_exon	R09G11.1	sup-10	missense	T->M
21	V	13963999	G	A	SNV	coding_exon	R10D12.14	R10D12.14	missense	V->I
35	III	9773904	C	T	SNV	coding_exon	R10E11.1	cbp-1	nonsense	Q->*
42	III	2920884	A	G	SNV	coding_exon	R10F2.4	R10F2.4	missense	M->T
32	IV	10410686	G	A	SNV	coding_exon	R10H10.7	R10H10.7	missense	P->L
15	I	388884	C	T	SNV	coding_exon	R119.5	R119.5	missense	V->I
8	IV	4803002	C	T	SNV	coding_exon	R11E3.8	dpf-5	missense	A->T
23	X	3662650	G	A	SNV	coding_exon	R11G1.1	R11G1.1	missense	D->N
42	III	6862978	G	A	SNV	coding_exon	R13F6.9	sma-3	missense	S->F
15	V	11840152	T	C	SNV	coding_exon	R13H4.8	R13H4.8	missense	V->A
27	III	5022423	C	T	SNV	coding_exon	R144.3	R144.3	missense	R->W
9	III	3170885	A	G	SNV	coding_exon	R148.5	R148.5	missense	E->G
35	III	7213806	G	A	SNV	coding_exon	R151.2	R151.2	missense	A->T
24	III	1969331	C	T	SNV	coding_exon	R155.2	R155.2	missense	D->N
24-2	III	1969331	C	T	SNV	coding_exon	R155.2	R155.2	missense	D->N
8	III	10847812	G	A	SNV	coding_exon	R17.1	fbxb-85	missense	A->V
11	X	1141594	G	A	SNV	coding_exon	R193.2	R193.2	missense	A->V
27	IV	8458673	G	A	SNV	coding_exon	T01B11.3	syx-4	missense	E->K
22	II	174627	T	G	SNV	coding_exon	T01D1.3	T01D1.3	missense	N->H
19	II	189148	G	A	SNV	coding_exon	T01D1.5	T01D1.5	missense	P->S
24	X	12110992	C	T	SNV	coding_exon	T01H10.1	lgc-13	missense	P->S
19	X	12124679	G	T	SNV	coding_exon	T01H10.6	lgc-17	missense	G->C
8	I	8575119	C	T	SNV	coding_exon	T01H8.1	rskn-1	nonsense	W->*
22	V	885235	C	T	SNV	coding_exon	T02B11.6	T02B11.6	missense	V->I
42	III	5972912	G	A	SNV	coding_exon	T04C9.4	mlp-1	missense	T->I
35	V	11743993	G	A	SNV	coding_exon	T04F3.1	T04F3.1	missense	D->N
22	X	11668814	G	A	SNV	coding_exon	T04F8.6	T04F8.6	missense	C->Y
24	IV	9563975	G	A	SNV	coding_exon	T05A1.2	col-122	missense	G->E
9	IV	6874454	A	G	SNV	coding_exon	T05A12.1	srx-19	missense	I->V
11	II	4667518	A	T	SNV	coding_exon	T05A7.10	fut-5	missense	I->K
8	II	4684570	C	T	SNV	coding_exon	T05A7.9	T05A7.9	missense	E->K
11	II	2724387	C	T	SNV	coding_exon	T05A8.4	nep-2	missense	M->I
9	V	15932349	T	C	SNV	coding_exon	T05G11.3	srw-26	missense	M->V
42	III	9737608	G	A	SNV	coding_exon	T05G5.2	hlh-4	missense	P->S
27	II	8073147	G	T	SNV	coding_exon	T05H10.7	T05H10.7	missense	L->I
9	V	6443503	G	A	SNV	coding_exon	T05H4.3	T05H4.3	missense	R->K
15	II	11213174	A	T	SNV	coding_exon	T06D8.1	T06D8.1	missense	T->S
19	II	11217734	G	A	SNV	coding_exon	T06D8.1	T06D8.1	missense	V->I
11	I	12715743	C	T	SNV	coding_exon	T06G6.5	T06G6.5	missense	L->F
11	II	8887884	G	A	SNV	coding_exon	T07D4.4	ddx-19	missense	G->E
11	II	7151260	T	G	SNV	coding_exon	T07F8.1	T07F8.1	nonsense	Y->*
9	IV	10557147	A	T	SNV	coding_exon	T07G12.10	zim-2	missense	D->V
15	II	1584167	T	C	SNV	coding_exon	T07H3.4	clec-21	missense	H->R
21	X	6301085	C	T	SNV	coding_exon	T07H6.1	T07H6.1	missense	P->L
9	II	4134748	A	T	SNV	coding_exon	T08H4.3	ast-1	missense	I->N
15	V	13164300	C	T	SNV	coding_exon	T09E8.1	noca-1	missense	S->F
25	V	15171269	G	A	SNV	coding_exon	T09F5.8	srh-278	missense	V->I
9	V	1870651	A	C	SNV	coding_exon	T10B5.4	T10B5.4	missense	W->G
9	V	16042135	C	T	SNV	coding_exon	T10C6.13	his-2	missense	R->H
24	II	3154210	C	T	SNV	coding_exon	T10D4.12	sri-32	missense	V->M
24-2	II	3154210	C	T	SNV	coding_exon	T10D4.12	sri-32	missense	V->M
8	I	6547660	C	T	SNV	coding_exon	T10E9.9	acdh-4	missense	G->E
23	V	15271233	C	T	SNV	coding_exon	T10H4.4	T10H4.4	missense	D->N
24	IV	5474299	G	A	SNV	coding_exon	T11F8.4	T11F8.4	missense	S->F
24-2	IV	5474299	G	A	SNV	coding_exon	T11F8.4	T11F8.4	missense	S->F
24-2	I	3735529	G	A	SNV	coding_exon	T12F5.5	larp-5	missense	R->W
8	IV	12050433	G	A	SNV	coding_exon	T12G3.8	bre-5	missense	T->I
21	V	16262905	G	A	SNV	coding_exon	T13F3.3	nhr-127	missense	G->E
42	V	16265442	C	T	SNV	coding_exon	T13F3.4	T13F3.4	missense	V->M
9	X	4618805	A	G	SNV	coding_exon	T13H2.4	pqn-65	missense	S->P
27	II	6736555	G	A	SNV	coding_exon	T14B4.2	T14B4.2	missense	A->T
35	III	5300349	G	A	SNV	coding_exon	T15B12.2	T15B12.2	missense	L->F
15	I	12378222	T	C	SNV	coding_exon	T15D6.3	gly-17	missense	E->G
24	V	12949381	G	A	SNV	coding_exon	T16G1.9	T16G1.9	missense	P->S
24	III	156563	G	A	SNV	coding_exon	T17A3.10	T17A3.10	missense	P->S
24-2	III	156563	G	A	SNV	coding_exon	T17A3.10	T17A3.10	missense	P->S
19	V	17227757	G	A	SNV	coding_exon	T19C9.5	scl-25	missense	G->R
24	V	3433462	A	T	SNV	coding_exon	T20C4.1	srj-9	missense	N->I
19	I	3927853	G	A	SNV	coding_exon	T20F5.7	T20F5.7	missense	A->V
27	II	8933097	G	A	SNV	coding_exon	T21B10.2	enol-1	missense	E->K
11	I	4399322	G	A	SNV	coding_exon	T21E12.4	dhc-1	missense	V->I
32	I	3945470	G	A	SNV	coding_exon	T21E3.3	lrp-2	missense	T->I
11	X	10869455	C	T	SNV	coding_exon	T21E8.2	pgp-7	missense	A->T
11	II	8628229	G	A	SNV	coding_exon	T22C8.6	T22C8.6	missense	A->V
19	II	2447911	G	A	SNV	coding_exon	T22D2.1	vab-19	missense	R->K
23	V	3609313	C	T	SNV	coding_exon	T22F3.10	T22F3.10	missense	S->N
8	III	546316	C	T	SNV	coding_exon	T22F7.1	T22F7.1	missense	A->V
9	X	12796557	G	A	SNV	coding_exon	T22H6.6	gei-3	missense	P->S
11	X	12796703	T	C	SNV	coding_exon	T22H6.6	gei-3	missense	E->G
19	I	6719112	G	A	SNV	coding_exon	T23B3.1	T23B3.1	missense	D->N
21	X	17671211	G	A	SNV	coding_exon	T23E7.2	T23E7.2	missense	G->S
9	I	7683365	G	A	SNV	coding_exon	T23G11.5	rlbp-1	missense	E->K
15	IV	13696219	A	G	SNV	coding_exon	T23G4.127	T23G4.127	missense	M->T
21	III	9245199	G	A	SNV	coding_exon	T23G5.5	dat-1	missense	G->E
25	II	9065344	G	A	SNV	coding_exon	T24B8.4	T24B8.4	missense	S->F
32	I	9957427	G	A	SNV	coding_exon	T24D1.5	T24D1.5	missense	S->F
19	II	11313251	G	A	SNV	coding_exon	T24F1.7	T24F1.7	missense	E->K
11	II	6235361	G	T	SNV	coding_exon	T24H7.5	tat-4	missense	T->K
24	II	6239256	G	A	SNV	coding_exon	T24H7.5	tat-4	missense	P->S
32	V	16785420	G	A	SNV	coding_exon	T25E12.4	dkf-2	missense	D->N
32	IV	3288270	G	A	SNV	coding_exon	T26C12.4	gcy-23	missense	R->C
21	III	13473736	T	A	SNV	coding_exon	T27E9.5	pssy-2	missense	C->S
27	II	4992861	C	T	SNV	coding_exon	T27F7.4	T27F7.4	missense	D->N
25	III	13487387	C	T	SNV	coding_exon	T28A8.1	twk-40	missense	G->E
24	V	6314207	G	A	SNV	coding_exon	T28C12.5	T28C12.5	missense	G->E
19	X	12974042	C	T	SNV	coding_exon	VF11C1L.1	ppk-3	missense	V->I
22	II	14060773	G	A	SNV	coding_exon	W01G7.4	W01G7.4	missense	R->Q
22	I	12743608	A	G	SNV	coding_exon	W02A11.4	uba-2	missense	E->G
27	II	11479119	C	T	SNV	coding_exon	W02B12.12	W02B12.12	missense	E->K
8	II	13917620	G	A	SNV	coding_exon	W02B8.3	mltn-3	missense	S->N
21	II	13931611	G	A	SNV	coding_exon	W02B8.5	hot-3	missense	T->I
35	I	11115049	G	A	SNV	coding_exon	W02B9.1	hmr-1	missense	A->V
15	I	6748665	T	G	SNV	coding_exon	W02D3.10	fnci-1	missense	K->T
22	I	12561216	G	A	SNV	coding_exon	W02D9.5	ssp-37	missense	T->I
22	I	12560578	G	A	SNV	coding_exon	W02D9.6	W02D9.6	missense	A->V
9	II	11970565	C	T	SNV	coding_exon	W03C9.7	mex-1	missense	H->Y
15	IV	523489	A	T	SNV	coding_exon	W03G1.7	asm-3	missense	I->N
11	I	13875835	A	G	SNV	coding_exon	W04A8.7	taf-1	missense	D->G
42	V	12485920	C	T	SNV	coding_exon	W04D2.2	srt-39	missense	P->L
9	V	12496402	T	C	SNV	coding_exon	W04D2.4	W04D2.4	missense	R->G
15	V	19749250	T	C	SNV	coding_exon	W04E12.6	clec-49	missense	Y->C
24	V	11710125	C	T	SNV	coding_exon	W05E10.4	tre-3	missense	S->N
24-2	V	11710125	C	T	SNV	coding_exon	W05E10.4	tre-3	missense	S->N
32	I	3400297	G	A	SNV	coding_exon	W05F2.4	W05F2.4	missense	S->F
24	III	65094	G	A	SNV	coding_exon	W05G11.6	W05G11.6	missense	A->V
24-2	III	65094	G	A	SNV	coding_exon	W05G11.6	W05G11.6	missense	A->V
22	II	12443184	C	T	SNV	coding_exon	W05H5.1	W05H5.1	missense	A->T
11	II	12447670	G	A	SNV	intron	W05H5.3	W05H5.3	splicing
23	X	6264288	G	A	SNV	coding_exon	W05H9.4	W05H9.4	missense	R->K
15	I	9061336	A	T	SNV	coding_exon	W06D4.4	prmt-7	missense	V->D
23	I	9066433	C	T	SNV	coding_exon	W06D4.6	rad-54	missense	L->F
11	II	9159562	T	A	SNV	coding_exon	W07A12.6	oac-54	missense	M->K
8	V	20728074	G	A	SNV	coding_exon	W07A8.2	W07A8.2	missense	P->L
21	IV	9809624	C	T	SNV	coding_exon	W08D2.3	dct-15	missense	C->Y
21	III	10729401	C	T	SNV	coding_exon	W09D10.2	tat-3	missense	E->K
15	II	3544921	T	C	SNV	coding_exon	W09G10.4	apd-3	missense	E->G
9	V	16922381	A	T	SNV	coding_exon	Y102A5C.4	Y102A5C.4	missense	I->F
24	III	6726929	C	G	SNV	coding_exon	Y102E9.2	Y102E9.2	missense	A->G
42	IV	15998236	G	A	SNV	coding_exon	Y105C5B.21	jac-1	missense	R->C
24	I	14445289	G	A	SNV	coding_exon	Y105E8A.12	catp-1	missense	L->F
22	I	14630664	C	T	SNV	coding_exon	Y105E8B.1	lev-11	missense	G->E
27	I	14637347	C	T	SNV	coding_exon	Y105E8B.2	exoc-8	missense	R->K
21	II	2884797	T	G	SNV	coding_exon	Y110A2AL.12	hpo-20	missense	T->P
42	IV	16996100	G	A	SNV	coding_exon	Y116A8C.16	rom-4	nonsense	W->*
11	IV	16945020	T	C	SNV	coding_exon	Y116A8C.9	Y116A8C.9	missense	D->G
24	III	1196231	G	A	SNV	coding_exon	Y119D3B.15	dss-1	missense	P->S
24-2	I	12929534	G	A	SNV	coding_exon	Y18D10A.21	Y18D10A.21	missense	S->N
15	I	686566	T	A	SNV	coding_exon	Y18H1A.10	Y18H1A.10	missense	M->L
15	I	695244	T	G	SNV	coding_exon	Y18H1A.2	Y18H1A.2	missense	S->R
24	I	759724	G	A	SNV	coding_exon	Y18H1A.8	Y18H1A.8	missense	V->I
27	I	759724	G	A	SNV	coding_exon	Y18H1A.8	Y18H1A.8	missense	V->I
11	V	17376117	G	A	SNV	coding_exon	Y20C6A.1	Y20C6A.1	missense	A->V
24	III	1720631	G	A	SNV	coding_exon	Y22D7AR.12	Y22D7AR.12	missense	T->I
9	V	10281273	T	G	SNV	coding_exon	Y22F5A.5	lys-2	missense	N->H
15	I	2553251	A	G	SNV	coding_exon	Y23H5B.1	Y23H5B.1	missense	N->S
11	IV	4393129	A	G	SNV	coding_exon	Y24D9A.2	set-21	missense	D->G
11	II	3111099	T	A	SNV	coding_exon	Y25C1A.13	Y25C1A.13	missense	N->Y
21	I	13067904	C	T	SNV	coding_exon	Y26D4A.2	hpo-2	missense	S->L
42	X	5275869	C	T	SNV	coding_exon	Y34B4A.3	hst-6	missense	A->V
8	III	12931809	G	A	SNV	coding_exon	Y37D8A.21	Y37D8A.21	missense	A->V
8	III	12945050	G	A	SNV	coding_exon	Y37D8A.23	unc-25	missense	M->I
24	IV	197080	G	A	SNV	coding_exon	Y38C1AA.2	csn-3	missense	G->E
8	II	12633635	C	T	SNV	coding_exon	Y38E10A.17	Y38E10A.17	missense	V->I
11	II	12580531	T	G	SNV	coding_exon	Y38E10A.5	clec-4	missense	T->P
11	II	12580535	AT	A	deletion	coding_exon	Y38E10A.5	clec-4	frameshift
11	V	20508422	T	C	SNV	coding_exon	Y38H6C.5	dct-10	missense	M->T
35	III	10632965	G	A	SNV	coding_exon	Y39A1A.10	Y39A1A.10	missense	E->K
25	III	10655815	C	T	SNV	coding_exon	Y39A1A.15	cnt-2	missense	L->F
9	III	10687137	A	G	SNV	coding_exon	Y39A1A.17	Y39A1A.17	missense	L->S
19	III	10790256	G	A	SNV	coding_exon	Y39A1B.2	ptr-19	missense	A->T
19	III	10790270	G	A	SNV	coding_exon	Y39A1B.2	ptr-19	missense	M->I
24	III	10789118	C	T	SNV	coding_exon	Y39A1B.2	ptr-19	missense	S->F
24	III	1852218	G	A	SNV	coding_exon	Y39A3CR.7	pqn-82	nonsense	W->*
24	III	1851047	C	T	SNV	coding_exon	Y39A3CR.7	pqn-82	nonsense	Q->*
24-2	III	1851047	C	T	SNV	coding_exon	Y39A3CR.7	pqn-82	nonsense	Q->*
21	V	19189939	G	A	SNV	coding_exon	Y39B6A.3	Y39B6A.3	missense	A->V
27	III	12971584	G	A	SNV	coding_exon	Y39E4A.3	Y39E4A.3	missense	T->M
11	V	3666721	A	T	SNV	coding_exon	Y39H10B.1	str-113	missense	N->K
8	IV	15045348	G	A	SNV	coding_exon	Y41E3.11	Y41E3.11	missense	R->Q
23	IV	15064053	G	A	SNV	coding_exon	Y41E3.18	Y41E3.18	missense	A->V
27	IV	14996105	C	T	SNV	coding_exon	Y41E3.3	Y41E3.3	missense	L->F
32	IV	8100554	G	T	SNV	coding_exon	Y42H9AR.2	Y42H9AR.2	missense	M->I
42	IV	16777494	G	A	SNV	coding_exon	Y43D4A.5	Y43D4A.5	missense	D->N
23	V	20801975	T	A	SNV	coding_exon	Y44A6D.5	Y44A6D.5	missense	Y->F
15	V	4179207	T	A	SNV	coding_exon	Y45G5AM.2	Y45G5AM.2	missense	Y->N
15	II	12770314	T	A	SNV	coding_exon	Y46G5A.13	tiar-2	missense	F->I
22	II	12734437	C	T	SNV	coding_exon	Y46G5A.4	snrp-200	missense	E->K
9	V	1764235	A	G	SNV	coding_exon	Y46H3B.1	clec-205	missense	D->G
9	V	4422043	C	T	SNV	coding_exon	Y47D7A.8	skr-14	missense	R->Q
35	I	3529764	C	T	SNV	coding_exon	Y47G6A.19	Y47G6A.19	missense	D->N
24-2	I	12089659	C	A	SNV	coding_exon	Y47H10A.3	Y47H10A.3	missense	V->L
42	I	11899141	C	T	SNV	coding_exon	Y47H9C.9	Y47H9C.9	missense	D->N
11	II	14235359	C	T	SNV	coding_exon	Y48B6A.11	jmjd-2	missense	E->K
11	II	14243494	A	T	SNV	coding_exon	Y48B6A.11	jmjd-2	missense	F->I
25	II	13608661	A	G	SNV	coding_exon	Y48E1B.10	gst-20	missense	Y->H
8	II	13589828	G	A	SNV	coding_exon	Y48E1B.16	clec-145	missense	P->S
15	II	13416976	C	T	SNV	coding_exon	Y48E1C.1	Y48E1C.1	missense	P->S
24-2	I	258132	G	C	SNV	coding_exon	Y48G1BR.1	Y48G1BR.1	missense	P->A
27	I	94160	A	T	SNV	coding_exon	Y48G1C.1	Y48G1C.1	missense	L->F
15	III	12452653	G	A	SNV	coding_exon	Y49E10.19	ani-1	missense	A->V
24	III	12469761	C	T	SNV	coding_exon	Y49E10.29	Y49E10.29	missense	P->L
15	V	5228153	G	A	SNV	coding_exon	Y49G5B.1	Y49G5B.1	missense	D->N
24	IV	5334545	G	A	SNV	coding_exon	Y4C6B.3	Y4C6B.3	nonsense	W->*
24-2	IV	5334545	G	A	SNV	coding_exon	Y4C6B.3	Y4C6B.3	nonsense	W->*
11	V	18497303	G	A	SNV	coding_exon	Y51A2D.19	slo-1	missense	G->D
27	IV	16524675	C	T	SNV	coding_exon	Y51H4A.5	Y51H4A.5	missense	S->N
22	II	1406071	G	A	SNV	coding_exon	Y51H7C.6	cogc-4	missense	G->S
27	IV	5468504	C	T	SNV	coding_exon	Y52D5A.1	Y52D5A.1	nonsense	R->*
23	I	12027739	C	T	SNV	coding_exon	Y53C10A.10	Y53C10A.10	missense	P->S
27	II	15104258	C	T	SNV	coding_exon	Y53F4B.21	Y53F4B.21	missense	L->F
32	II	15007263	G	A	SNV	coding_exon	Y53F4B.9	Y53F4B.9	missense	R->W
19	II	14755115	G	A	SNV	coding_exon	Y54E2A.4	Y54E2A.4	missense	G->D
24-2	I	14706352	C	T	SNV	coding_exon	Y54E5A.4	npp-4	missense	A->T
11	III	2563439	T	C	SNV	coding_exon	Y54F10AM.11	Y54F10AM.11	missense	M->V
11	III	2334333	A	C	SNV	coding_exon	Y54F10BM.1	Y54F10BM.1	missense	I->L
24	III	2330475	C	T	SNV	coding_exon	Y54F10BM.13	Y54F10BM.13	missense	G->R
24	III	2316887	G	A	SNV	coding_exon	Y54F10BM.2	iffb-1	missense	D->N
23	II	14463140	G	A	SNV	coding_exon	Y54G11B.1	dmsr-6	missense	G->E
11	IV	2831713	A	G	SNV	coding_exon	Y54G2A.48	Y54G2A.48	missense	M->T
23	III	5146066	C	T	SNV	coding_exon	Y54H5A.2	Y54H5A.2	missense	E->K
24	III	471128	G	A	SNV	coding_exon	Y55B1BR.4	Y55B1BR.4	missense	P->S
21	IV	1017660	G	A	SNV	coding_exon	Y55F3AM.3	Y55F3AM.3	missense	A->T
15	IV	804224	C	T	SNV	coding_exon	Y55F3BL.1	mrpl-46	missense	P->L
24-2	IV	881675	G	A	SNV	coding_exon	Y55F3BR.1	Y55F3BR.1	missense	G->E
9	IV	865061	T	C	SNV	intron	Y55F3BR.2	Y55F3BR.2	splicing
32	II	12279962	G	A	SNV	coding_exon	Y57A10A.29	Y57A10A.29	missense	D->N
22	IV	14657306	G	A	SNV	coding_exon	Y57G11C.33	Y57G11C.33	missense	A->T
27	IV	14771172	C	T	SNV	coding_exon	Y57G11C.44	Y57G11C.44	missense	V->I
11	V	18083329	G	A	SNV	coding_exon	Y59A8B.11	fbxa-106	missense	S->F
42	V	18106188	C	T	SNV	coding_exon	Y59A8B.14	par-4	missense	P->L
24	V	2190929	C	T	SNV	coding_exon	Y5H2B.4	srbc-42	missense	A->T
24-2	V	2190929	C	T	SNV	coding_exon	Y5H2B.4	srbc-42	missense	A->T
8	V	19966081	G	A	SNV	coding_exon	Y60A3A.5	srh-171	missense	V->I
9	V	4554260	A	T	SNV	coding_exon	Y61A9LA.12	Y61A9LA.12	missense	N->I
35	I	497706	C	T	SNV	coding_exon	Y65B4BL.3	Y65B4BL.3	missense	R->K
24	III	11634997	C	T	SNV	coding_exon	Y66A7A.8	tbx-33	missense	E->K
15	X	14454969	A	G	SNV	coding_exon	Y66C5A.1	Y66C5A.1	missense	S->P
15	III	11549990	C	T	SNV	coding_exon	Y66D12A.13	Y66D12A.13	missense	T->I
32	III	1561368	C	T	SNV	coding_exon	Y67D2.2	Y67D2.2	missense	P->S
23	IV	2643866	G	T	SNV	coding_exon	Y69A2AR.2	ric-8	missense	V->F
24	IV	10963063	G	A	SNV	coding_exon	Y69E1A.7	aqp-3	missense	S->L
24-2	IV	10963063	G	A	SNV	coding_exon	Y69E1A.7	aqp-3	missense	S->L
42	V	18642754	C	T	SNV	coding_exon	Y69H2.11	Y69H2.11	missense	S->L
24	V	18655021	G	A	SNV	coding_exon	Y69H2.12	tag-336	missense	G->E
11	I	13616463	C	T	SNV	coding_exon	Y6B3A.1	agef-1	missense	E->K
15	I	13760362	C	T	SNV	coding_exon	Y6B3B.4	Y6B3B.4	missense	T->I
9	V	15723834	T	A	SNV	coding_exon	Y6E2A.6	srh-140	missense	D->E
27	III	1167385	G	A	SNV	coding_exon	Y71D11A.1	cdh-12	missense	G->R
8	III	1134437	C	T	SNV	coding_exon	Y71D11A.5	lgc-46	nonsense	W->*
9	I	2917836	G	C	SNV	coding_exon	Y71F9AL.2	Y71F9AL.2	missense	W->S
9	III	2835066	T	A	SNV	coding_exon	Y71H2AR.1	Y71H2AR.1	missense	I->N
35	IV	6397756	C	T	SNV	coding_exon	Y73B6BL.21	sfrp-1	nonsense	W->*
9	I	2470980	T	C	SNV	coding_exon	Y74C10AL.2	Y74C10AL.2	missense	K->E
15	V	1381643	G	A	SNV	coding_exon	Y75B7AL.4	rga-4	missense	L->F
15	III	12193342	C	T	SNV	coding_exon	Y75B8A.12	osm-12	missense	G->D
19	III	13459796	C	T	SNV	coding_exon	Y76A2A.1	tag-164	missense	S->F
24-2	III	13440210	G	A	SNV	coding_exon	Y76A2A.2	cua-1	missense	S->F
21	III	12041678	C	T	SNV	coding_exon	Y79H2A.4	Y79H2A.4	missense	S->F
35	X	15811880	G	A	SNV	coding_exon	Y7A5A.11	Y7A5A.11	missense	R->Q
8	V	18943133	G	A	SNV	coding_exon	Y80D3A.8	Y80D3A.8	missense	V->I
22	I	13518220	G	A	SNV	coding_exon	Y87G2A.1	Y87G2A.1	missense	G->E
11	I	1570485	G	A	SNV	coding_exon	Y92H12A.1	src-1	missense	E->K
32	IV	2714082	G	A	SNV	coding_exon	Y94H6A.7	Y94H6A.7	missense	L->F
9	I	900743	T	G	SNV	coding_exon	Y95B8A.5	gpa-16	missense	L->R
15	V	5793699	T	C	SNV	coding_exon	ZC250.2	ZC250.2	missense	Y->H
24-2	I	6377789	C	T	SNV	coding_exon	ZC308.1	gld-2	missense	P->L
24	X	10072715	C	T	SNV	coding_exon	ZC373.5	ZC373.5	missense	M->I
23	V	14188486	G	T	SNV	intron	ZC376.6	ZC376.6	splicing
11	III	5271270	C	T	SNV	coding_exon	ZC395.8	ztf-8	missense	G->E
25	V	6788258	G	A	SNV	intron	ZC404.2	ZC404.2	splicing
42	X	5027884	C	T	SNV	coding_exon	ZC449.1	ZC449.1	missense	S->F
19	V	12781974	G	A	SNV	coding_exon	ZC455.1	ZC455.1	missense	D->N
25	IV	12365570	C	T	SNV	coding_exon	ZC518.3	ccr-4	missense	S->L
24	III	13008271	C	T	SNV	coding_exon	ZK1010.9	snf-7	missense	A->V
21	V	15336035	G	A	SNV	coding_exon	ZK1037.10	wrt-7	missense	P->S
24	V	15337130	C	T	SNV	coding_exon	ZK1037.10	wrt-7	missense	V->I
24-2	V	15337130	C	T	SNV	coding_exon	ZK1037.10	wrt-7	missense	V->I
8	V	7700716	G	A	SNV	coding_exon	ZK105.3	ZK105.3	missense	E->K
22	II	9224450	G	A	SNV	coding_exon	ZK1067.3	ZK1067.3	missense	A->T
19	II	7050896	G	A	SNV	coding_exon	ZK1127.5	ZK1127.5	missense	G->S
11	III	10138351	A	G	SNV	coding_exon	ZK1128.7	ZK1128.7	missense	T->A
19	II	5831641	G	A	SNV	coding_exon	ZK1248.2	col-74	missense	A->T
9	IV	9683680	T	G	SNV	coding_exon	ZK1251.3	ZK1251.3	missense	I->S
11	II	5528243	G	T	SNV	coding_exon	ZK177.1	ZK177.1	missense	C->F
24	II	11641482	G	A	SNV	coding_exon	ZK20.2	kin-6	missense	E->K
11	V	17116681	T	A	SNV	coding_exon	ZK218.8	ZK218.8	missense	F->Y
22	V	18465208	C	T	SNV	coding_exon	ZK228.4	ZK228.4	missense	A->V
11	I	13015540	A	G	SNV	coding_exon	ZK256.1	pmr-1	missense	N->S
24-2	I	14884897	C	T	SNV	coding_exon	ZK270.2	frm-1	missense	G->E
9	V	9667960	T	A	SNV	coding_exon	ZK287.1	ZK287.1	missense	F->Y
35	III	6022763	G	A	SNV	coding_exon	ZK328.1	cyk-3	missense	E->K
32	III	6009844	G	A	SNV	coding_exon	ZK328.2	eftu-2	missense	A->T
35	III	6015185	G	A	SNV	coding_exon	ZK328.5	npp-10	missense	S->F
15	III	7075854	T	C	SNV	coding_exon	ZK418.6	ZK418.6	missense	E->G
24	X	4167486	G	A	SNV	coding_exon	ZK470.1	ZK470.1	missense	D->N
24-2	X	4167486	G	A	SNV	coding_exon	ZK470.1	ZK470.1	missense	D->N
11	III	9119562	G	A	SNV	coding_exon	ZK512.3	ced-11	missense	D->N
32	I	7444048	G	A	SNV	coding_exon	ZK524.2	unc-13	missense	G->E
11	II	4947617	C	T	SNV	coding_exon	ZK546.2	ZK546.2	missense	S->F
9	IV	10928531	A	T	SNV	coding_exon	ZK593.5	dnc-1	missense	W->R
8	III	9824333	G	A	SNV	coding_exon	ZK632.13	lin-52	missense	A->V
25	III	7890302	C	T	SNV	coding_exon	ZK688.5	ZK688.5	missense	D->N
9	II	5996692	A	G	SNV	coding_exon	ZK75.1	ins-4	missense	E->G
19	IV	12558264	C	T	SNV	coding_exon	ZK795.2	ZK795.2	missense	M->I
25	I	14187741	C	T	SNV	coding_exon	ZK849.2	ZK849.2	missense	R->K
9	V	12184138	C	T	SNV	coding_exon	ZK863.4	ZK863.4	missense	S->N
35	I	14961549	C	T	SNV	coding_exon	ZK909.4	ces-2	missense	S->L
24	II	10112816	C	T	SNV	coding_exon	ZK945.9	lov-1	missense	E->K
